1 Identification and characterization of diverse OTU deubiquitinases in  
2 bacteria

3 Alexander F. Schubert<sup>1,2,\*</sup>, Justine V. Nguyen<sup>3,\*</sup>, Tyler G. Franklin<sup>3</sup>, Paul P. Geurink<sup>4</sup>, Cameron  
4 G. Roberts<sup>3</sup>, Daniel J. Sanderson<sup>3</sup>, Lauren N. Miller<sup>3</sup>, Huib Ovaa<sup>4</sup>, Kay Hofmann<sup>5</sup>, Jonathan N.  
5 Pruneda<sup>1,3,‡</sup>, and David Komander<sup>1,6,7,‡</sup>

6  
7 1. Medical Research Council Laboratory of Molecular Biology, Cambridge, UK

8 2. Present address: Department of Structural Biology, Genentech Inc., South San Francisco, CA,  
9 USA

10 3. Department of Molecular Microbiology & Immunology, Oregon Health & Science University,  
11 Portland, OR, USA

12 4. Oncode Institute & Department of Cell and Chemical Biology, Leiden University Medical  
13 Centre, Leiden, The Netherlands

14 5. Institute for Genetics, University of Cologne, Cologne, DE

15 6. Ubiquitin Signalling Division, The Walter and Eliza Hall Institute of Medical Research,  
16 Parkville, AU

17 7. Department of Medical Biology, The University of Melbourne, Melbourne, AU

18 \* These authors contributed equally

19 ‡ Address correspondence to Jonathan N. Pruneda ([pruneda@ohsu.edu](mailto:pruneda@ohsu.edu)) or David Komander  
20 ([dk@wehi.edu.au](mailto:dk@wehi.edu.au))

21

22 **RUNNING TITLE**

23 Bacterial OTU deubiquitinases

24

## 25 **ABSTRACT**

26 Manipulation of host ubiquitin signaling is becoming an increasingly apparent evolutionary  
27 strategy among bacterial and viral pathogens. By removing host ubiquitin signals, for example,  
28 invading pathogens can inactivate immune response pathways and evade detection. The Ovarian  
29 Tumor (OTU) family of deubiquitinases regulates diverse ubiquitin signals in humans. Viral  
30 pathogens have also extensively co-opted the OTU fold to subvert host signaling, but the extent  
31 to which bacteria utilize the OTU fold was unknown. We have predicted and validated a set of  
32 OTU deubiquitinases encoded by several classes of pathogenic bacteria. Biochemical assays  
33 highlight the ubiquitin and polyubiquitin linkage specificities of these bacterial deubiquitinases.  
34 By determining the ubiquitin-bound structures of two examples, we demonstrate the novel  
35 strategies that have evolved to both thread an OTU fold and to recognize a ubiquitin substrate.  
36 With these new examples, we perform the first cross-kingdom structural analysis of the OTU  
37 fold that highlights commonalities among distantly-related OTU deubiquitinases.

38

## 39 **KEYWORDS**

40 Bacterial effector / deubiquitinase / pathogen / protein structure / ubiquitin

41

## 42 **INTRODUCTION**

43 Outside of its canonical role in targeted proteasomal degradation, ubiquitin (Ub) signaling plays  
44 crucial roles in many other aspects of eukaryotic biology including immune responses (Ebner *et*  
45 *al*, 2017; Swatek & Komander, 2016). In fact, the ability of Ub modifications to form discrete  
46 polymers (polyUb) allows it to perform multiple signaling functions even within the same  
47 pathway (Komander & Rape, 2012). TNF signaling, for example, relies upon the concerted  
48 action of several nondegradative polyUb signals (K63-, Met1-, and K11-linked chains) as well as  
49 the degradative K48-linked chains in order to ultimately achieve NfκB transcriptional activation  
50 (Ebner *et al*, 2017). PolyUb chains can also be combined into complex higher order architectures  
51 that further diversify their signaling capacities (Haakonsen & Rape, 2019). These processes are  
52 tightly regulated by Ub ligases that assemble the signals, Ub-binding domains that respond to  
53 them, and specialized proteases termed deubiquitinases (DUBs) that remove them. Breakdown of

54 this regulation can lead to immune hyper- or hypoactivation, and has been linked to several  
55 human diseases (Popovic *et al*, 2014).

56 Although the Ub system is largely exclusive to eukaryotes, invading viruses and bacteria have  
57 evolved strategies of manipulating host Ub signaling responses during infection (Wimmer &  
58 Schreiner, 2015; Lin & Machner, 2017). These strategies can include pathogen-encoded Ub  
59 ligases or DUBs that redirect or remove host signals, respectively. Pathogen-encoded DUBs can  
60 affect host functions such as innate immune activation, autophagy, or morphology (Wan *et al*,  
61 2019; Mesquita *et al*, 2012; Pruneda *et al*, 2018). When their ability to remove host Ub signals is  
62 taken away, some pathogens show reduced fitness and infectivity (Rytkönen *et al*, 2007; Fischer  
63 *et al*, 2017). Interestingly, though some bacterial DUBs are entirely foreign and reflect  
64 convergent evolution (Wan *et al*, 2019), others appear to adopt eukaryote-like protein folds  
65 and/or mechanisms (Pruneda *et al*, 2016).

66 Humans encode six families of cysteine-dependent DUBs that all fall underneath the CA clan of  
67 proteases and one family of Ub-specific metalloproteases from the MP clan. An additional  
68 family of ubiquitin-like proteases (ULPs) regulate NEDD8 and SUMO signaling and belong to  
69 the CE cysteine protease clan. The majority of bacterial DUBs studied to-date are related to the  
70 CE clan of ULPs, and appear to predominately target host K63-linked polyUb signals (Pruneda  
71 *et al*, 2016). The ULP fold is also widely used among viruses, both as a Ub-specific protease and  
72 a traditional peptidase (Wimmer & Schreiner, 2015).

73 Another DUB fold that is common to both eukaryotes and viruses is the Ovarian Tumor (OTU)  
74 family. Humans encode 16 DUBs in the OTU family with important functions in signaling  
75 pathways such as innate immunity and cell cycle regulation (Du *et al*, 2019). Some OTUs, such  
76 as OTUB1 and OTULIN, are highly specific for certain polyUb signals (K48- and Met1-linked  
77 chains, respectively), and these properties not only provide insight to their biological functions  
78 (proteasomal degradation and inflammatory signaling, respectively), but also prove useful in  
79 technological applications such as ubiquitin restriction analysis (Mevisen *et al*, 2013;  
80 Keusekotten *et al*, 2013; Du *et al*, 2019). Viruses use OTU DUBs to block innate immune  
81 activation during infection, often by cleaving both Ub and the antiviral Ub-like modifier ISG15  
82 (Bailey-Elkin *et al*, 2014). In bacteria, however, only two reported cases of the OTU fold have  
83 been identified. The first, ChlaOTU from *Chlamydia pneumoniae*, was predicted by sequence

84 similarity (Makarova *et al*, 2000) and shown to play an active role in the clearance of Ub signals  
85 following infection (Furtado *et al*, 2013). The second example, LotA, plays a similar role in  
86 *Legionella pneumophila* infection (Kubori *et al*, 2018). Whether these bacterial OTUs were  
87 unique, however, or represent a wider adaptation of the OTU fold among bacteria remained  
88 unknown.

89 To determine if, like the CE clan ULPs, the OTU fold is a common adaptation for DUB activity  
90 across bacteria, we generated an OTU sequence profile and predicted distantly-related examples  
91 among bacterial genomes. Using an array of Ub substrates and *in vitro* assays, we confirmed that  
92 predicted OTUs from pathogens such as *Escherichia albertii*, *Legionella pneumophila*, and  
93 *Wolbachia pipientis* were *bona fide* DUBs. Furthermore, with one exception all of our confirmed  
94 OTUs were Ub-specific (over Ub-like modifiers) and targeted a defined subset of polyUb chain  
95 types, much like human OTUs (Mevisen *et al*, 2013). Structural analysis of two examples  
96 revealed novel modes of Ub substrate recognition and, surprisingly, even a permuted sequence  
97 topology that still gives rise to a familiar OTU fold. Our new bacterial OTU DUB structures  
98 allowed for the first cross-kingdom structural analysis, from which we established a framework  
99 for identifying evolutionary adaptations in the S1 substrate binding site that impart DUB activity.  
100 This work establishes the OTU fold as a common tool used by bacteria to manipulate host Ub  
101 signaling, and provides insight into the origins and adaptations of the OTU fold across  
102 eukaryotes, bacteria, and viruses.

103

## 104 **RESULTS**

### 105 **Identification of bacterially-encoded OTU deubiquitinases**

106 Given the expansive use of the OTU DUB fold in eukaryotes and viruses to regulate key aspects  
107 of cellular biology and infection, respectively (Du *et al*, 2019), we sought to determine if, like  
108 the CE clan ULPs (Pruneda *et al*, 2016), the family extends into bacteria as well. Through  
109 generating a sequence alignment of eukaryotic and viral OTU domains, we created a generalized  
110 sequence profile that was used to identify related sequences among bacteria. Candidates  
111 identified through this approach were further scrutinized by secondary structure prediction and  
112 domain recognition using the PHYRE2 server (Kelley *et al*, 2015). Those that encoded active  
113 site sequences matching the Pfam motif (Pfam Entry PF02338) embedded in appropriate

114 elements of secondary structure (e.g. an active site Cys motif at the beginning of an  $\alpha$ -helix)  
115 were prioritized for subsequent validation. Reassuringly, this approach also detected the first  
116 characterized bacterial OTU, ChlaOTU (Makarova *et al*, 2000; Furtado *et al*, 2013), and we  
117 followed this naming convention for predictions with previously unknown function. For  
118 biochemical validation, we selected *Escherichia albertii* ‘EschOTU’ (GenBank EDS93808.1),  
119 *Legionella pneumophila* ceg7 (lpg0227, GenBank AAU26334.1), *Burkholderia ambifaria*  
120 ‘BurkOTU’ (GenBank EDT05193.1), *Chlamydia pneumoniae* ChlaOTU (CPn\_0483, GenBank  
121 AAD18623.1), *Rickettsia massiliae* ‘RickOTU’ (dnaE2, GenBank ABV84894.1), *Wolbachia*  
122 *pipientis* strain wPip ‘wPipOTU’ (WP0514, GenBank CAQ54622.1), *Wolbachia pipientis* wMel  
123 ‘wMelOTU’ (WD\_0443, GenBank AAS14166.1), and *Legionella pneumophila* ceg23 (lpg1621,  
124 GenBank AAU27701.1) (Fig 1A and B). With the exception of ChlaOTU, which had no  
125 recognizable conservation of the general base His motif, all of the selected examples contained  
126 both catalytic Cys and general base His consensus sequences that closely matched the  
127 established motifs and secondary structure (Fig 1A). Remarkably, however, our active site  
128 analysis suggested that some examples, particularly EschOTU, could thread through the OTU  
129 fold in a topology that is distinct from any previously studied example (Fig 1A, red arrow). Our  
130 selected candidates are encoded by a wide range of Gram-negative bacteria that span the  
131 chlamydiae, alpha-, beta-, and gammaproteobacterial classes (Fig 1B). Consistent with putative  
132 host-targeted DUB activity, all of the identified species have reported interactions with  
133 eukaryotic hosts (Fig 1C), some of which are linked to severe human diseases (e.g. Legionnaire’s  
134 disease) or altered biology (e.g. *Wolbachia* sex determination). In fact, the majority of our  
135 candidates arise from obligate intracellular bacteria that depend upon host interactions for  
136 survival. Outside of the active site motifs, our OTU domain predictions have strikingly low  
137 sequence similarity to each other and to the archetypal human example, OTUB1, that centers  
138 around only ~15% identity (Fig 1D).

139 To test our predictions for DUB activity, we synthesized coding regions or amplified them from  
140 bacterial samples, designed constructs that (where possible) contain the minimal predicted OTU  
141 domain, and proceeded with *E. coli* expression and purification (Fig 1E). We found the  
142 *Legionella* ceg7 protein to be the most difficult to work with, and after much effort arrived at a  
143 preparation that retained a SUMO solubility tag (Fig 1E). As a first measure of *in vitro* DUB  
144 activity, we treated the putative bacterial OTUs with a Ub-Propargylamine (Ub-PA) activity-

145 based probe that covalently reacts with a DUB's active site Cys, resulting in an 8.5 kDa shift in  
146 molecular weight on SDS-PAGE (Ekkebus *et al*, 2013). By this approach, EschOTU, *ceg7*,  
147 BurkOTU, wMelOTU, and *ceg23* all showed robust reactivity with the Ub-PA probe that was  
148 abolished following mutation of the predicted active site Cys to Ala (Fig 1F). This assay  
149 validated some of our OTU predictions and our identification of a catalytic Cys. To visualize  
150 genuine protease activity with improved sensitivity we implemented a fluorescence polarization  
151 assay that detects the release of a C-terminal isopeptide-linked fluorescent peptide (Geurink *et al*,  
152 2012). In addition to EschOTU, *ceg7*, wMelOTU, and *ceg23*, this assay could also detect DUB  
153 activity for RickOTU (albeit at high enzyme concentration) (Fig 1G). ChlaOTU, wPipOTU, and  
154 BurkOTU showed no activity against this substrate, but BurkOTU did exhibit a dramatic  
155 increase in fluorescence polarization indicative of a strong interaction with the Ub substrate (Fig  
156 1G). For those that demonstrated activity against the fluorescent Ub substrate, we additionally  
157 tested for dependence upon our predicted active site triad residues (catalytic Cys, general base  
158 His, and acidic). In all cases, mutation of the Cys or His residues to Ala abolished DUB activity  
159 (Fig 1H, EV1A). The acidic position is typically the second amino acid C-terminal to the general  
160 base His, and in similar manner to human OTUs, its mutation can result in complete,  
161 intermediate, or no loss in activity in the bacterial OTUs (Fig 1H, EV1A). Members in the A20  
162 subfamily of human OTUs encode their acidic residue N-terminal to the catalytic Cys  
163 (Komander & Barford, 2008); we predicted a similarly-positioned acidic residue in the *ceg23*  
164 sequence (D21), and its mutation abolished DUB activity (Fig 1H, EV1A).

### 165 **Substrate specificities of bacterial OTU deubiquitinases**

166 Across eukaryotic and viral examples, the OTU family has been shown to display a remarkable  
167 diversity in substrates specificities, both at the level of Ub/Ub-like specificity (e.g. vOTU dual  
168 Ub/ISG15 activity (Frias-Staheli *et al*, 2007; Akutsu *et al*, 2011; James *et al*, 2011)) and at the  
169 level of polyUb chain types (e.g. K11, K48, or Met1 specificity (Mevissen *et al*, 2013)).

170 Therefore, we sought to assess our bacterial OTUs for both types of substrate specificity.

171 To measure Ub/Ub-like specificity, we used fluorescence polarization to measure activity toward  
172 Ub, ISG15, NEDD8, and SUMO1 in parallel (Fig 2A-C, EV2A). EschOTU, *ceg7*, RickOTU,  
173 and wMelOTU primarily targeted Ub under these conditions (Fig 2A and C, EV2A). In addition  
174 to its activity toward the Ub substrate, *ceg23* could also cleave the SUMO1 substrate (Fig 2C,

175 EV2A). This particular combination of Ub/Ub-like proteolytic activities had previously only  
176 been observed in XopD from the plant pathogen *Xanthomonas campestris* (Pruneda *et al*, 2016).  
177 While BurkOTU did not demonstrate any cleavage of the Ub/Ub-like substrates, the increased  
178 signal indicative of an interaction with the Ub substrate was specific and was not observed with  
179 any of the Ub-like substrates (Fig 2B and C). ChlaOTU and wPipOTU showed no activity  
180 against any of the Ub/Ub-like substrates.

181 Specificity at the level of polyUb chain type was measured by constructing a panel of all eight  
182 canonical diUb linkages for use in gel-based cleavage assays (Mevisse *et al*, 2013; Michel *et al*,  
183 2018). To better visualize any discrimination between chain types, enzyme concentration and  
184 incubation times were optimized such that at least one diUb species was nearly or completely  
185 cleaved by the end of the experiment (Fig 2D and E, EV2B). Under no conditions were we able  
186 to observe activity for ChlaOTU or wPipOTU. All other bacterial OTUs (including BurkOTU)  
187 showed DUB activities with moderate discrimination between chain types (Fig 2F).

188 Interestingly, EschOTU, ceg7, BurkOTU, RickOTU, wMelOTU, and ceg23 all shared a common  
189 basal preference for K6-, K11-, K48-, and K63-linked chains (Fig 2F), a combination not  
190 observed in any of the human OTU DUBs (Mevisse *et al*, 2013) but surprisingly similar to  
191 some viral OTUs (Dzimianski *et al*, 2019). Among these chain types there were some indications  
192 of further preference: EschOTU, ceg7, and RickOTU demonstrated a slight preference toward  
193 K48-linked chains, BurkOTU toward K11, wMelOTU toward K6, and ceg23 more strongly  
194 toward K63 linkages (Fig 2D-F, EV2B). Underneath these preferences were several lowly-  
195 cleaved background activities, including K33-linked chains across all active examples and an  
196 additional activity toward Met1-linked chains from ceg7. Notably, aside from reactivity with the  
197 Ub-PA probe, diUb cleavage offered the first robust measure of activity for BurkOTU and  
198 allowed for the confirmation of all three predicted active site triad residues by mutagenesis (Fig  
199 EV2C). The peculiar requirement of polyUb chains for BurkOTU activity is reminiscent of  
200 OTULIN (Keusekotten *et al*, 2013), and could indicate a mechanism by which binding to the S1'  
201 site drives substrate recognition and catalysis.

## 202 **Bacterial OTU deubiquitinases demonstrate novel modes of substrate recognition**

203 To confirm that our validated bacterial DUBs are indeed members of the OTU family, we  
204 determined a crystal structure of wMelOTU to 1.5 Å resolution by molecular replacement with

205 the core structure of yeast OTU1 (Messick *et al*, 2008) (Fig 3A, EV3A, Table 1). The wMelOTU  
206 structure exhibits a pared down canonical OTU domain architecture with a central  $\beta$ -sheet  
207 supported underneath by an  $\alpha$ -helical subdomain, but although additional  $\alpha$ -helical content  
208 typically sandwiches the  $\beta$ -sheet from above, there is very little additional support in the  
209 wMelOTU structure (Fig 3A and B, EV3B). The core of the OTU fold that contains the active  
210 site (the central  $\beta$ -sheet and two most proximal supporting  $\alpha$ -helices) closely resembles other  
211 OTU domains such as OTUB1 (Fig 3B, 1.6 Å RMSD) and vOTU (Fig EV3B, 1 Å RMSD),  
212 whereas the surrounding areas of structure are more divergent (Juang *et al*, 2012; Akutsu *et al*,  
213 2011). Two regions of structure near the S1 substrate recognition site, encompassing 6 and 7  
214 amino acids respectively, are missing from the electron density (Fig 3A, EV3A). The structure  
215 confirms our prediction and mutagenesis of active site residues (Fig 1A and H, 3A). However,  
216 the catalytic triad is misaligned (Fig 3A) as a result of the loop preceding the general base His  
217 (the so-called His-loop) occupying a descended conformation that would also occlude entry of  
218 the Ub C-terminus into the active site (Fig 3C). Thus, while the apo wMelOTU structure  
219 validates our prediction of an OTU fold, it raised new questions as to the mechanisms of  
220 substrate recognition.

221 Ub substrate recognition by wMelOTU was visualized by covalently trapping a wMelOTU-Ub  
222 complex and determining its crystal structure to 1.8 Å resolution (Fig 3D, EV3C, Table 1). As  
223 anticipated, the Ub C-terminus was found to be covalently linked to the wMelOTU catalytic Cys.  
224 The Ub-bound structure closely resembles the apo wMelOTU structure, with several key  
225 differences that provide insight into substrate recognition. Firstly, not only did Ub binding shift  
226 the His-loop up into position that opens entry into the active site, but in doing so it aligned the  
227 catalytic triad to facilitate nucleophilic attack (Fig 3E). The second major insight from the  
228 wMelOTU-Ub structure is the mode of Ub binding, which is very distinct from anything  
229 observed in previous OTU studies. The two regions of missing density in the apo wMelOTU  
230 structure are ordered in the Ub-bound complex as two  $\beta$ -hairpins that wrap around the Ub,  
231 forming an embrace (Fig 3D and E, EV3C). Together with additional interactions from a loop  
232 extending off the edge of the central  $\beta$ -sheet, wMelOTU forms a tripartite S1 site that becomes  
233 stabilized upon substrate binding (Fig 3D). Although this S1 site is on a similar surface of the  
234 OTU domain, the distinctive recognition elements (to be discussed in a broader context below)



235 position the bound Ub moiety in a drastically different orientation that is 107° or 167° rotated  
236 from the vOTU-Ub or OTUB1:Ub structures, respectively (Fig EV3D) (Akutsu *et al*, 2011;  
237 Juang *et al*, 2012).

238 The primary and secondary contacts to Ub form the bulk of the interaction and arise from the  
239 two stabilized  $\beta$ -hairpins (Fig 3D and F). The primary hairpin extends from the central  $\beta$ -sheet  
240 and forms hydrophobic interactions with the I44 hydrophobic patch of Ub. L154, L156, and  
241 V149 of wMelOTU are buried in hydrophobic interactions with Ub L8, I44, H68, and V70 (Fig  
242 3F). The secondary  $\beta$ -hairpin replaces what is typically a helical arm in other OTUs and contacts  
243 the Ub I36 hydrophobic patch with H99 (Fig 3F). Q147 from the primary  $\beta$ -hairpin of  
244 wMelOTU forms a hydrogen bond to the carbonyl backbone of Ub L71, but also to the side  
245 chain of N101 from the secondary  $\beta$ -hairpin as if to lock the embrace (Fig 3F). Mutations at any  
246 of the Ub-contacting wMelOTU residues negatively impact DUB activity (Fig 3G). Moving into  
247 the active site, R72 of the Ub C-terminus is coordinated by hydrogen bonds to the backbone of  
248 the secondary  $\beta$ -hairpin, which also positions wMelOTU R106 to stack with Ub R74 (Fig 3H).  
249 Proximal to the active site, wMelOTU displays several conserved features of the OTU fold.  
250 Firstly, the GlyGly motif is held in place by wMelOTU with a conserved aromatic residue,  
251 W123 (Fig 3H). Secondly, a conserved basic residue, R76, supports both the loop containing  
252 W123 as well as the loop preceding the catalytic Cys (the so-called Cys-loop) that forms the  
253 oxyanion hole (Fig 3H). Mutation at either of these conserved positions abrogates DUB activity  
254 (Fig 3G). In sum, though many features of the wMelOTU fold and active site arrangement are  
255 reminiscent of eukaryotic and viral OTUs, Ub recognition within the S1 site itself is distinct from  
256 previously studied examples.

### 257 **An alternate topological arrangement of the OTU fold**

258 Intrigued by our prediction of an alternate threading through the OTU fold of EschOTU (Fig  
259 1A), we sought to validate its sequence topology by determining a structure. A crystal structure  
260 of a covalent EschOTU-Ub complex was determined to 2.1 Å resolution by molecular  
261 replacement with Ub and a sieved model of the OTU domain generated using MUSTANG  
262 (Konagurthu *et al*, 2010) (Fig 4A and D, EV4A, Table 1). The structure confirms our predicted  
263 and tested active site residues (Fig 1A and H, 4A) as well as the overall OTU domain  
264 architecture. Like wMelOTU, the EschOTU OTU domain is a pared down version that aligns

265 well with OTUB1 and vOTU through the central  $\beta$ -sheet and supporting  $\alpha$ -helices (0.6 Å and 0.5  
266 Å RMSD, respectively) (Fig 4B and C), but lacks  $\alpha$ -helices above the sheet that would form the  
267 canonical sandwich structure. Perhaps the most remarkable insight, which will be discussed in a  
268 broader context below, is the permutation of the N- and C-termini that leads to altered threading  
269 through the OTU fold. While the termini are typically in close proximity above the central  $\beta$ -  
270 sheet in all other known OTU folds, EschOTU threads a loop at this position and the termini are  
271 instead located in the supporting helical region beneath the sheet, near the helical arm of the S1  
272 site (Fig 4A-C). Another interesting feature observed in the crystal lattice is how an N-terminal  
273 region (aa 184-192) from a symmetry-related EschOTU molecule adds an additional strand onto  
274 the edge of the central  $\beta$ -sheet (Fig 4A, EV4B and C). Although this strand aligns well with  
275 structurally-related strands in OTUB1 and vOTU (Fig 4B and C), its removal has no effect on  
276 DUB activity (Fig EV4D) and thus we believe its position was a result of crystallization.

277 The Ub-binding S1 site is comprised almost entirely of a primary interaction between a helical  
278 arm region and the I44 hydrophobic patch of Ub, and makes very few contacts through what is  
279 normally a secondary interaction site in other OTUs (Fig 4D-F). The bound Ub is held in an  
280 orientation distinct from the vOTU-Ub structure (95° rotation, Fig 4D and F) but very similar to  
281 that observed in OTUB1 and other closely related OTUs (21° rotation, Fig 4D and E). At the  
282 primary site of interaction, the EschOTU helical arm residues C338 and I341, as well as nearby  
283 L224 all contact the I44 hydrophobic patch of the bound Ub (Fig 4G), and mutation of these  
284 positions results in diminished DUB activity (Fig 4H). A small secondary interaction site is  
285 formed between L241 in the edge strand of the EschOTU central  $\beta$ -sheet and the Ub I36  
286 hydrophobic patch (Fig 4G). Although this interaction surface is smaller, it likely plays an  
287 important role in coordinating Ub L71 and L73 as the C-terminus enters the active site, and  
288 accordingly mutation of L241 also decreases DUB activity (Fig 4H). In a similar theme to  
289 wMelOTU and other OTU examples, structural elements close to the active site are much more  
290 conserved. R74 in the Ub C-terminus is coordinated by EschOTU E343, the GlyGly motif is  
291 secured by W214, and the Cys-loop is stabilized by the conserved basic residue K318 (Fig 4I).  
292 Mutation at any of these EschOTU positions diminishes or abrogates DUB activity (Fig 4H).  
293 Altogether, unlike wMelOTU, the S1 site of EschOTU more closely resembles canonical OTUs  
294 with a familiar helical arm. The sequence topology of the EschOTU fold, however, is distinct

295 from all other OTU structures and suggests an interesting evolutionary history that is discussed  
296 in more detail below.

### 297 **A cross-kingdom analysis of the OTU fold**

298 Our diverse list of confirmed bacterial OTU DUBs and representative crystal structures afforded  
299 the first opportunity for a cross-kingdom analysis of the OTU fold across eukaryotes and  
300 prokaryotes, as well as viruses. Because of the significantly altered topology we observed in the  
301 EschOTU structure (Fig 1A, 5A), we focused our first analysis on the threading of the OTU  
302 domain. Human OTUB1 and vOTU represent the most typical arrangement, wherein the N- and  
303 C-termini of the OTU domain are positioned near each other in the  $\alpha$ -helical region above the  
304 central  $\beta$ -sheet (Fig 5B, open grey arrow), and the catalytic triad is threaded in the C...H- $\Omega$ -  
305 D/N/E arrangement (where  $\Omega$  represents a large aromatic residue) (Fig 1A, 5B). EschOTU,  
306 however, encodes a reversed H- $\Omega$ -N...C arrangement of the catalytic triad as a result of a  
307 sequence permutation that closes the traditional N- and C-termini into a loop (Fig 5A and B,  
308 compare open and closed grey arrows) and opens new termini near the helical arm region (Fig  
309 5A and B, compare open and closed black arrows). A third arrangement of the catalytic triad is  
310 represented by members of the A20 subfamily of OTUs (Komander & Barford, 2008; Mevissen  
311 *et al*, 2016) (Fig 5C). Instead of encoding the acidic triad residue on the same  $\beta$ -strand as the  
312 general base His, A20-family OTUs encode this residue before the catalytic Cys and position it  
313 directly above the  $\beta$ -sheet in tertiary structure (Komander & Barford, 2008) (Fig 5C).

314 Our structure of wMelOTU shows that its sequence topology matches the most typical OTU  
315 arrangement seen in OTUB1 and vOTU (Fig 3A, 5B), and we would predict BurkOTU,  
316 RickOTU, and wPipOTU to be similar as well (Fig 1A). Our alignment and mutagenesis data  
317 would suggest that *Legionella ceg23* is most similar to the A20 sequence topology, and positions  
318 the acidic D21 residue above the remaining C29 and H270 triad residues (Fig 1H, EV1A, 5C).  
319 Based on our secondary structure and catalytic motif analyses, we would predict that *Legionella*  
320 *ceg7* adopts yet another topology such that the  $\beta$ -strand encoding the general base His is  
321 threaded in the opposite direction (Fig 1A); testing this arrangement, however, awaits structure  
322 determination.

323 To test whether a simple permutation of the OTU sequence was still permissive to protein  
324 folding and DUB activity, we rearranged the sequence of CCHFV vOTU to match the altered

325 topology observed in EschOTU (compare Fig 5A and 5D). By closing a loop (Fig 5D, grey  
326 arrow) and opening new N- and C-termini (Fig 5D, black arrow), we were able to generate a  
327 permuted vOTU<sup>P</sup> variant that mimicked the EschOTU sequence topology. Despite the altered  
328 threading, the vOTU<sup>P</sup> variant was still folded and could be modified by the Ub-PA activity-based  
329 probe (Fig 5E). The vOTU<sup>P</sup> variant also demonstrated cleavage of the Ub-KG(TAMRA)  
330 substrate, though to a lesser degree than the wild-type topology (Fig 5F). Thus, the OTU fold is  
331 evidently amenable to permutation as well as to repositioning of catalytic residues, making future  
332 sequence analysis of this and other highly divergent examples of the OTU fold very difficult.

### 333 **A framework for understanding the S1 site of OTU domains**

334 Because we were able to determine structures of wMelOTU and EschOTU with substrate Ub  
335 bound, we could also use this new information to better describe elements of the S1 site that are  
336 either common or distinctive across eukaryotic, bacterial, and viral OTUs. Owing to its basic role  
337 in establishing DUB activity in OTUs, one would expect the S1 site to be somewhat conserved  
338 (as opposed to other sites, such as S1', that further discriminate the type of Ub substrate),  
339 however we note a remarkable variability in the structural elements used to contact Ub.  
340 Surrounding a commonly positioned helix (constant region, CR), we could define three regions  
341 of variability (variable regions, VR) that together form the S1 site (Fig 6A).

342 The first region, VR1, is often the primary site of interaction and is typically referred to as the  
343 helical arm (henceforth we propose to coin this region as simply 'arm'). Adaptation of the VR1  
344 arm region can be observed as either a short  $\alpha$ -helix (e.g. in the Otubain or OTUD subfamilies),  
345 an extended  $\alpha$ -helical region (e.g. in EschOTU or the A20 subfamily), or even a  $\beta$ -hairpin (e.g.  
346 in wMelOTU) (Fig 6A and B). As we noted with other VRs, different OTU VR1s can be used to  
347 contact different interaction surfaces of the Ub substrate, including the I44 or I36 hydrophobic  
348 patches (Fig EV6A). We defined VR2 as the edge of the central  $\beta$ -sheet (Fig 6A), which in  
349 addition to the common configuration of  $\beta$ -strands (e.g. in the Otubain or OTUD subfamilies),  
350 can be extended by additional  $\beta$ -strands (e.g. in vOTU or wMelOTU), or contracted (e.g. in  
351 EschOTU) (Fig 6C). Additionally, the arterivirus PLP2 encodes an inserted zinc finger at VR-2  
352 that forms the basis for its interaction with Ub (Fig 6C) (van Kasteren *et al*, 2013). This VR2  
353 edge can be used to contact Ub surfaces such as the I44 or I36 hydrophobic patches, or in the  
354 case of wMelOTU the D58 acidic patch (Fig EV6B). The final variable region identified in our

355 analysis, VR3, is a  $\beta$ -turn in the central  $\beta$ -sheet (Fig 6A) that can be short (e.g. in the OTUD  
356 subfamily or EschOTU), extended but unstructured (e.g. in the Otubain subfamily or vOTU), or  
357 extended to form a  $\beta$ -hairpin (e.g. in the A20 subfamily or wMelOTU) (Fig. 6D). This region has  
358 been observed to either be unutilized for Ub recognition, or to contact the I44 or I36 hydrophobic  
359 patches (Fig EV6C).

360 Together, by analyzing the S1 substrate recognition sites of eukaryotic, bacterial, and viral OTUs  
361 we have identified surprising diversity confined to common regions of the fold. These variable  
362 regions can be adapted in a number of ways and can accommodate diverse orientations of  
363 substrate binding. Through cataloging the multiple adaptations of the S1 site, we have  
364 established a framework for future OTU domain analysis.

365

## 366 **DISCUSSION**

367 Our prediction and validation of OTU DUBs across a range of evolutionarily distinct bacteria has  
368 highlighted a number of distinguishing features in the enzyme fold and mechanism, and in  
369 addition suggests that the OTU fold is an evolutionarily common and adaptable fold among  
370 eukaryotes, viruses, and bacteria. Given the low sequence similarity among our selected bacterial  
371 OTU domains, the similarities observed in Ub/Ub-like and polyUb chain specificities were  
372 surprising. All the active OTUs we identified targeted Ub preferentially over the Ub-like  
373 modifiers ISG15, NEDD8, or SUMO1. In addition to its DUB activity, in our assays *Legionella*  
374 *ceg23* also cleaved the SUMO1 substrate, which could indicate a role for SUMO1 signaling in  
375 restricting *Legionella* growth. The overall preference toward Ub signals is reflective of the  
376 specificity observed in human OTUs (Mevisen *et al*, 2013), whereas viral OTUs have evolved  
377 to target both Ub and antiviral ISG15 signaling (Frias-Staheli *et al*, 2007). At the level of chain  
378 specificity, we noted a common, underlying preference for K6-, K11-, K48-, and K63-linked  
379 chains and only slight biases toward particular chain types in certain examples. A lack of chain  
380 specificity is not uncommon among OTUs (Mevisen *et al*, 2013; Dzimianski *et al*, 2019), but  
381 contrasts the co-evolved preferences for K63-linked chains observed among bacterial CE clan  
382 DUBs (Pruneda *et al*, 2016). Some human DUBs require accessory domains, proteins, or post-  
383 translational modifications to acquire their chain specificity (Mevisen & Komander, 2017). It's  
384 possible that the bacterial OTUs leverage some unknown host cofactors or modifications to

385 finetune or, in the cases of ChlaOTU and wPipOTU, activate their DUB functions. Human  
386 OTUD5, for example, demonstrates phosphorylation-dependent activity (Huang *et al*, 2012). In  
387 addition, several bacterial effectors require binding to host cofactors, including CE-clan  
388 acetyltransferases (Mittal *et al*, 2010), the *Shigella flexneri* kinase OspG (Pruneda *et al*, 2014),  
389 and the *Pseudomonas aeruginosa* phospholipase ExoU (Anderson *et al*, 2011). It is also possible  
390 that polyUb chain specificity is not required, as appears to be the case for viral OTUs  
391 (Dzimianski *et al*, 2019), or that the slight chain biases we observe reflect early signs of evolving  
392 specificities.

393 Similar to bacterial CE clan DUBs (Pruneda *et al*, 2016), we observe a remarkable diversity in  
394 the evolution of the S1 substrate binding site among our bacterial OTUs (Fig 6A-D). wMelOTU  
395 in particular uses a disorder-to-order transition to embrace the Ub moiety through both of its  
396 commonly used hydrophobic patches. Whether these S1 site features have evolved to suit each  
397 organism's particular host-microbe interactions or they reflect convergent evolution of DUB  
398 activity from a common protease scaffold remains an open question. The diversity in the S1 site  
399 among bacterial OTUs is in stark contrast to nairovirus OTUs, however, which appear to have  
400 only made minor adjustments to a common template (Dzimianski *et al*, 2019). Regardless,  
401 through comparison of OTU:Ub recognition across eukaryotes, viruses, and bacteria we have  
402 identified three regions of sequence and structural variability that together form the substrate-  
403 binding S1 site (Fig 6A). The arm (VR-1),  $\beta$ -sheet edge (VR-2), and extended  $\beta$ -turn (VR-3) can  
404 recognize any number of common interaction surfaces on Ub (Fig EV6A-C). Interactions within  
405 the immediate vicinity of the OTU active site appear to be the only universal requirements for  
406 Ub recognition at the S1 site (Fig 3H and 4I).

407 Classically, evolutionarily distinct clans of cysteine proteases have been classified by differences  
408 in tertiary structure as well as the linear topological arrangement of catalytic residues (Barrett &  
409 Rawlings, 1996). In this way, even though the CA clan (which encompass all known human  
410 cysteine-dependent DUBs) and CE clan (including all human ULPs) are structurally related, they  
411 are classified separately due in large part to the threading of the active site: CA proteases encode  
412 the catalytic Cys before the general base His, whereas CE proteases are the reverse. With its  
413 permuted OTU fold (Fig 1A and 5A), classifying EschOTU into a protease clan is less  
414 straightforward. It has been proposed in the MEROPS (Rawlings *et al*, 2018) and SCOP (Fox *et*

415 *al*, 2014) databases that CA and CE proteases share a common ancestor and have since  
416 undergone circular permutation. Since that event occurred, however, other changes have arisen  
417 that further distinguish the clans, namely the position of the acidic component of the catalytic  
418 triad. Aside from the A20 subfamily which encode their acidic residue N-terminal to the catalytic  
419 Cys, all OTUs follow a common trend of the acidic residue being positioned two amino acids C-  
420 terminal of the general base His on the same  $\beta$ -strand. This is distinct from CE proteases that  
421 encode their acidic residue on a neighboring strand. Although EschOTU does encode an acidic  
422 residue (D278) at a position structurally analogous to acidic residues in CE clan catalytic triads,  
423 it is spatially too far ( $>6 \text{ \AA}$ ) to support the general base H262. EschOTU N264, on the other  
424 hand, is in the correct position for a catalytic triad (Fig 5A), and mutagenesis data confirm its  
425 role in DUB activity (Fig 1H and EV1A). Thus, despite its reversed sequence topology, we  
426 propose that EschOTU is more closely related to the OTU family of the CA protease clan, and  
427 may either represent an evolutionary intermediate between the CA and CE clans or reflect an  
428 additional circular permutation of the fold.

429 Among our validated bacterial OTUs we noted a common threshold of  $\sim 15\%$  sequence identity  
430 to the human OTUB1 sequence (Fig 1D). It is likely that this reflects a hard cutoff of our  
431 approach to prediction, as opposed to the true minimal conservation of the OTU domain itself.  
432 Considering both the potential for diversity of VRs in the S1 site as well as altered sequence  
433 topology, bioinformatic efforts to identify additional, possibly more divergent OTUs will be  
434 challenging. It's possible that through additional cross-kingdom analysis of the OTU fold,  
435 underlying structural and functional elements will be revealed that can assist with further  
436 prediction of even more distantly-related OTU domains in diverse bacteria.

437

## 438 **MATERIALS AND METHODS**

### 439 *Bacterial OTU prediction*

440 To search for sequence-divergent OTU domains in bacteria, a multiple sequence alignment of all  
441 established OTU DUBs from eukaryotic and viral origin was generated using the L-INS-I  
442 algorithm of the MAFFT package (Katoh *et al*, 2002). From this alignment, a generalized  
443 sequence profile was constructed, scaled, and subjected to iterative refinement using the  
444 PFTOOLS package (Bucher *et al*, 1996). The final profile was run against a current version of

445 the UNIPROT database. Matches to bacterial sequences with p-values < 0.01 were submitted to  
446 the PHYRE2 web portal for secondary structure prediction and domain recognition (Kelley *et al*,  
447 2015). Results were manually inspected for conservation of the active site Cys and His motifs  
448 described in Pfam (Entry PF02338) within  $\alpha$ -helical and  $\beta$ -strand secondary structure,  
449 respectively.

#### 450 *Construct design and cloning*

451 With the exception of ceg23, which was cloned from *Legionella pneumophila* subsp.  
452 *Pneumophila* (strain Philadelphia) genomic DNA, all selected bacterial OTU genes were codon  
453 optimized for *E. coli* expression and synthesized (GeneArt). EschOTU (184-362), ceg7 (1-298),  
454 and RickOTU (156-360) were cloned into the pOPIN-S *E. coli* expression vector (Berrow *et al*,  
455 2007) that encodes an N-terminal His-SUMO tag. BurkOTU (1-505), ChlaOTU (193-473),  
456 wPipOTU (66-354), wMelOTU (40-205 or 1-215), and ceg23 (9-277) were cloned into the  
457 pOPIN-B *E. coli* expression vector (Berrow *et al*, 2007) that encodes an N-terminal, 3C protease  
458 cleavable His tag. EschOTU (184-362) and EschOTU (195-362) were additionally cloned into  
459 the pOPIN-B vector for comparison of activities. CCHFV vOTU (3-162) was cloned into  
460 pOPIN-B. The permuted vOTU<sup>P</sup> was generated by moving residues 75-162 upstream of  
461 residues 3-74, with a GlyGlySerSer linker encoded between the two.

#### 462 *Protein expression and purification*

463 All bacterial OTUs were expressed and purified with a similar approach. Transformed Rosetta 2  
464 (DE3) *E. coli* were grown in LB at 37 °C to an optical density (600 nm) of 0.6-0.8, at which  
465 point the culture was cooled to 18 °C and induced with 0.2 mM IPTG for 16 hr. Bacteria were  
466 harvested, resuspended in lysis buffer (25 mM Tris, 200 mM NaCl, 2 mM  $\beta$ -mercaptoethanol,  
467 pH 8.0), and subjected to one freeze-thaw cycle. The cells were then incubated on ice with  
468 lysozyme, DNase, and protease inhibitor cocktail (SigmaFAST, Sigma-Aldrich) for 30 min,  
469 followed by lysis with sonication. The clarified lysates were applied to cobalt affinity resin  
470 (HisPur, Thermo Fisher Scientific) and washed with additional lysis buffer prior to elution with  
471 lysis buffer containing 250 mM imidazole. Eluted proteins were then subjected to proteolysis  
472 with either 3C protease or SENP1 SUMO protease during overnight 4 °C dialysis back to lysis  
473 buffer. The cleaved proteins were passed back over cobalt affinity resin, concentrated using  
474 10,000 MWCO centrifugal filters (Amicon, EMD Millipore), and passed over a Superdex 75 pg



475 16/600 size exclusion column (GE Healthcare) equilibrated in 25 mM Tris, 150 mM NaCl, 5  
476 mM DTT, pH 8.0. Purified protein was visualized by SDS-PAGE, and appropriate fractions were  
477 pooled, concentrated, quantified by absorbance (280 nm), and flash frozen for storage at -80 °C.  
478 In the case of *ceg7*, the SUMO tag was left in place to stabilize the protein.

#### 479 *Ub activity-based probe assays*

480 The Ub-PA activity-based probe was prepared using intein chemistry as described previously  
481 (Wilkinson *et al*, 2005). Activity-based probe reactions were performed as described (Pruneda &  
482 Komander, 2019). Bacterial OTUs were prepared at 5 μM concentration in 25 mM Tris, 150 mM  
483 NaCl, 10 mM DTT, pH 7.4 and incubated at room temperature for 15 min. Ub-PA was prepared  
484 at 7.5 μM concentration in the same buffer. Reactions were initiated by mixing 5 μL each of  
485 DUB and Ub-PA, followed by incubation for 1 hr at 37 °C before quenching in SDS sample  
486 buffer. Products were resolved by SDS-PAGE and visualized by Coomassie staining.

#### 487 *Fluorescence polarization Ub/Ub-like cleavage assays*

488 Fluorescent Ub- and Ub-like-KG(TAMRA) substrates were prepared as described previously  
489 (Geurink *et al*, 2012; Basters *et al*, 2014). Cleavage was monitored by fluorescence polarization  
490 as previously described (Pruneda & Komander, 2019). Bacterial OTUs were prepared at twice  
491 the desired enzyme concentration in 25 mM Tris, 100 mM NaCl, 5 mM β-mercaptoethanol, 0.1  
492 mg/mL BSA, pH 7.4 (FP buffer) and incubated at room temperature for 15 min. Fluorescent  
493 Ub/Ub-like substrates were prepared at 20 nM concentration in FP buffer. 5 μL each of DUB and  
494 substrate were mixed in a black, low-volume 384-well plate (Greiner) and fluorescence  
495 polarization was monitored at room temperature on a Clariostar plate reader equipped with a  
496 540/590 nm filter set (BMG Labtech). Ub/Ubl substrate alone and KG(TAMRA) peptide alone  
497 were included as negative and positive controls, respectively, and used to convert polarization  
498 values to percent substrate remaining. To account for FP changes that arise from Ub/Ub-like  
499 noncovalent binding or contaminating OTU-independent activity, data from the inactive Cys-to-  
500 Ala mutants were used to correct the FP signals. The averages from three technical replicates of  
501 one representative assay are shown. Heatmaps display the corrected percent substrate remaining  
502 calculated as the average of the final five measurements.

#### 503 *Ub chain specificity profiling*

504 K27-linked diUb was prepared chemically (van der Heden van Noort *et al*, 2017), Met1-linked  
505 diUb was expressed and purified as a gene fusion, and the six other linkages were prepared  
506 enzymatically (Michel *et al*, 2018). Ub chain cleavage assays were performed as described  
507 (Pruneda & Komander, 2019). Bacterial OTUs were prepared at twice the desired concentration  
508 in 25 mM Tris, 150 mM NaCl, 10 mM DTT, pH 7.4 and incubated at room temperature for 15  
509 min. diUb chains were prepared at 10  $\mu$ M in 25 mM Tris, 150 mM NaCl, pH 7.4. The reaction  
510 was initiated by mixing 10  $\mu$ L each of DUB and diUb, and allowed to proceed at 37 °C for the  
511 indicated time periods. 5  $\mu$ L reaction samples were quenched in SDS sample buffer, resolved by  
512 SDS-PAGE, and visualized by Coomassie staining. Pixel intensities for the mono- and diUb  
513 bands were quantified using ImageJ (Schneider *et al*, 2012) and used to calculate the percent  
514 substrate remaining presented in the heatmap.

#### 515 *Protein crystallization*

516 wMelOTU (1-215) was prepared at 10 mg/mL and crystallized in sitting drop format with 0.2 M  
517 sodium acetate, 32% PEG 4K, 0.1 M Tris pH 8.5 at 18 °C. Crystals were cryoprotected in mother  
518 liquor containing 30% glycerol prior to vitrification.

519 wMelOTU-Ub was formed by reacting wMelOTU (40-205) with molar excess Ub-C2Br  
520 activity-based probe (prepared according to (Wilkinson *et al*, 2005)) at room temperature for 16  
521 hr. The covalent wMelOTU-Ub was purified by size exclusion chromatography using a  
522 Superdex 75 pg 16/600 column (GE Healthcare). The wMelOTU-Ub complex was prepared at  
523 10 mg/mL and crystallized in sitting drop format with 20% PEG 6K, 0.1 M citrate pH 4.6 at 18  
524 °C. Crystals were cryoprotected in mother liquor containing 30% glycerol prior to vitrification.

525 The EschOTU-Ub complex was formed by reacting EschOTU (184-362) with molar excess His-  
526 3C-tagged Ub-C2Br activity-based probe at room temperature for 16 hr. The reacted complex  
527 was purified using cobalt affinity resin, eluted with 250 mM imidazole, cleaved with 3C  
528 protease, and subjected to final purification by size exclusion chromatography using a Superdex  
529 75 pg 16/600 column (GE Healthcare). The EschOTU-Ub complex was prepared at 12 mg/mL  
530 and crystallized in sitting drop format with 0.8 M sodium formate, 10% PEG 8K, 10% PEG 1K,  
531 0.1 M sodium acetate pH 4.5 at 18 °C. Crystals were cryoprotected in mother liquor containing  
532 25% glycerol prior to vitrification.

#### 533 *Data collection, structure determination, and refinement*

534 Diffraction data were collected at Diamond Light Source (DLS). Images were integrated using  
535 XDS (Kabsch, 2010) or DIALS (Winter *et al*, 2018) software and scaled using Aimless (Evans  
536 & Murshudov, 2013). The wMelOTU structure was determined by molecular replacement with  
537 Phaser (McCoy *et al*, 2007) using a minimal OTU domain from *S. cerevisiae* OTU1 (PDB 3C0R  
538 (Messick *et al*, 2008)). The wMelOTU-Ub structure was determined molecular replacement with  
539 Phaser (McCoy *et al*, 2007) using the apo wMelOTU and Ub structures (PDB 1UBQ (Vijay-  
540 Kumar *et al*, 1987)) as models. The EschOTU-Ub structure was determined by molecular  
541 replacement with Phaser (McCoy *et al*, 2007) using a sieved OTU domain structure generated by  
542 MUSTANG-MR with an OTU multiple sequence alignment and set of corresponding structures  
543 (Konagurthu *et al*, 2010), in addition to Ub (PDB 1UBQ (Vijay-Kumar *et al*, 1987)). All  
544 structures underwent iterative rounds of manual building in Coot (Emsley *et al*, 2010) and  
545 refinement in Phenix (Adams *et al*, 2010). Structure figures were prepared using Pymol  
546 (Schrödinger).

#### 547 *Comparative OTU structural analysis*

548 The wMelOTU-Ub and EschOTU-Ub crystal structures were compared to published structures  
549 from all major OTU subfamilies, including human Otubain, OTUD, OTULIN, and A20  
550 subfamilies as well as the viral vOTU, PLP2, and PRO subfamilies. A focus was placed on Ub-  
551 bound structures that reveal the structural requirements of the S1 binding site. Human Otubain  
552 subfamily structures included OTUB1 (PDB 4DDG (Juang *et al*, 2012)) and OTUB2 (PDB 4FJV  
553 (Altun *et al*, 2015)). The human OTUD subfamily included OTUD1 (PDB 4BOP (Mevisen *et*  
554 *al*, 2013)), OTUD2 (PDB 4BOZ (Mevisen *et al*, 2013)), OTUD3 (PDB 4BOU (Mevisen *et al*,  
555 2013), and OTUD5 (PDB 3TMP (Huang *et al*, 2012)). Human OTULIN subfamily structures  
556 included OTULIN (PDB 3ZTZ (Keusekotten *et al*, 2013)). Human A20 subfamily structures  
557 included A20 (PDB 5LRX (Mevisen *et al*, 2016)), Cezanne (PDB 5LRW (Mevisen *et al*,  
558 2016)), and TRABID (PDB 3ZRH (Licchesi *et al*, 2011)). The viral vOTU subfamily included  
559 CCHFV vOTU (PDB 3PHW (Akutsu *et al*, 2011)), Qalyub virus vOTU (PDB 6DX1  
560 (Dzimianski *et al*, 2019)), Dera Ghazi Khan virus vOTU (PDB 6DX2 (Dzimianski *et al*, 2019)),  
561 Taggart virus vOTU (PDB 6DX3 (Dzimianski *et al*, 2019), and Farallon virus vOTU (PDB  
562 6DX5 (Dzimianski *et al*, 2019)). The PLP2 and PRO viral subfamily structures included EAV  
563 PLP2 (PDB 4IUM (van Kasteren *et al*, 2013)) and TYMV PRO (PDB 4A5U (Lombardi *et al*,

564 2013)). Structures were aligned based on their core OTU fold (central  $\beta$ -sheet and two  
565 supporting  $\alpha$ -helices) and visualized using Pymol (Schrödinger).

566

## 567 **ACKNOWLEDGEMENTS**

568 We would like to thank the beamline staff at DLS I04, I04-1, and I24 for their assistance. Access  
569 to DLS was supported, in part, by the EU FP7 infrastructure grant BIOSTRUCT-X (contract no.  
570 283570). This work was supported by a VICI grant from the Netherlands Organization for  
571 Scientific Research N.W.O. (724.013.002, HO), the Medical Research Council (U105192732,  
572 DK), the European Research Council (309456, DK), the Lister Institute for Preventative  
573 Medicine (DK), an EMBO Long-Term Fellowship (JNP), Oregon Health & Science University  
574 (JNP), and The Collins Medical Trust in Portland, OR (JNP). TGF was supported by  
575 5T32GM071338-14, Program in Molecular and Cellular Biosciences.

576

## 577 **AUTHOR CONTRIBUTIONS**

578 DK conceived the project. JNP and DK designed all experiments. KH performed the initial  
579 bioinformatic prediction which was manually inspected by JNP and DK. JNP, AS, TGF, JVN,  
580 DS, and LNM performed biochemical experiments. PPG, HO, and CGR contributed key  
581 reagents. JNP and AS determined the crystal structures. JNP and DK analyzed the data and wrote  
582 the manuscript with input from all of the authors.

583

## 584 **DATA AVAILABILITY**

585 Coordinates and structure factors for the wMelOTU, wMelOTU-Ub, and EschOTU-Ub  
586 structures have been deposited in the Protein Data Bank under accession numbers 6W9O, 6W9R,  
587 and 6W9S, respectively.

588

## 589 **CONFLICT OF INTEREST STATEMENT**

590 The authors declare no competing interests.

591

## 592 **FIGURE LEGENDS**

593

### 594 **Figure 1. Prediction and validation of OTU DUBs from bacteria**

595 A. Pfam-generated sequence logo of the regions surrounding the OTU catalytic Cys and  
596 general base His (marked with asterisks). The conservation of these regions in the human  
597 OTUB1 and predicted bacterial OTUs are shown below, together with their relative order  
598 in the sequence topology indicated by the sequence position as well as green and red  
599 arrows for the typical and atypical arrangements, respectively.

600 B. Bacterial species to which the predicted OTUs belong.

601 C. Outcome of interactions between the highlighted bacterial species and their respective  
602 eukaryotic hosts.

603 D. Percent identity matrix calculated from a PSI-Coffee alignment (Notredame *et al*, 2000)  
604 of the predicted OTU domains. OTUB1 (80-271), EschOTU (184-362), ceg7 (1-298),  
605 BurkOTU (186-315), ChlaOTU (193-473), RickOTU (161-356), wPipOTU (66-354),  
606 wMelOTU (40-205), and ceg23 (9-277) were used to create the alignment.

607 E. Coomassie-stained SDS-PAGE gel showing purified protein from the predicted bacterial  
608 OTU constructs.

609 F. Ub-PA activity-based probe assay for wild-type (WT) and catalytic Cys-to-Ala mutants  
610 (CA). Strong, Cys-dependent reactivity is indicated with asterisks.

611 G. Ub-KG(TAMRA) cleavage assay monitored by fluorescence polarization at the indicated  
612 DUB concentrations. Note that BurkOTU displays an increase in fluorescence  
613 polarization, indicative of noncovalent binding.

614 H. Heatmap representation of DUB activity against the Ub-KG(TAMRA) substrate shown in  
615 G., including the WT enzyme and Ala substitutions at the predicted catalytic Cys, general  
616 base His, or acidic position.

617

### 618 **Figure 2. Substrate specificity profiling of bacterial OTU DUBs**

- 619 A. Ub/Ub-like specificity assay measuring activity of WT and inactive Cys-to-Ala  
620 wMelOTU toward the Ub-, ISG15-, NEDD8-, and SUMO1-KG(TAMRA) substrates.
- 621 B. Ub/Ub-like specificity assay measuring activity of WT and inactive Cys-to-Ala  
622 BurkOTU toward the Ub-, ISG15-, NEDD8-, and SUMO1-KG(TAMRA) substrates.  
623 Note that the rise in fluorescence polarization signal is specific to the Ub substrate.
- 624 C. Heatmap representation of corrected OTU activities toward the Ub and Ub-like  
625 fluorescent substrates. In the reactions marked by an asterisk, an unusually high level of  
626 noise in fluorescence polarization signal was observed, likely a result of high OTU  
627 concentration.
- 628 D. Ub chain specificity assay measuring wMelOTU activity toward the eight diUb linkages.  
629 Reaction samples were quenched at the indicated timepoints, resolved by SDS-PAGE,  
630 and visualized by Coomassie staining.
- 631 E. Ub chain specificity assay measuring BurkOTU activity toward the eight diUb linkages.  
632 Reaction samples were quenched at the indicated timepoints, resolved by SDS-PAGE,  
633 and visualized by Coomassie staining.
- 634 F. Heatmap representation of WT bacterial OTU activities toward the eight diUb linkages at  
635 the indicated timepoints.

636

637 **Figure 3. wMelOTU structure reveals novel Ub embrace mechanism**

- 638 A. Cartoon representation of the 1.5 Å *W. pipientis* wMelOTU crystal structure with labeled  
639 termini, missing regions, and features of the active site.
- 640 B. Structural alignment of the core OTU folds (central  $\beta$ -sheet and two supporting  $\alpha$ -  
641 helices) from human OTUB1 (green, PDB 4DDG) and wMelOTU (purple). Surrounding  
642 regions are less-well conserved and shown as semi-transparent.
- 643 C. Enlarged region of the OTUB1:Ub structure (PDB 4DDG) showing entry of the Ub C-  
644 terminus (red) into the OTUB1 active site (green). The wMelOTU structure (purple) is  
645 overlaid to highlight the structural conflict between the downward position of the His-  
646 loop and the Ub C-terminus.

- 647 D. 1.8 Å crystal structure of the covalent wMelOTU-Ub complex. wMelOTU (cartoon,  
648 pink) is linked to the Ub (surface red) C-terminus through its active site. Primary,  
649 secondary, and tertiary regions of the Ub-binding S1 site are indicated.
- 650 E. Structural overlay of the apo (violet) and Ub-bound (pink) wMelOTU structures  
651 highlighting the repositioning of the His-loop to accommodate entry of the Ub C-  
652 terminus, as well as ordering of two regions in the S1 site that form an embrace around  
653 Ub.
- 654 F. Detailed view of the primary and secondary interfaces between wMelOTU (pink) and Ub  
655 (red) observed in the wMelOTU-Ub structure. wMelOTU and Ub residues participating  
656 in the interface are shown with ball and stick representation.
- 657 G. Ub-KG(TAMRA) cleavage assay monitoring the effects of structure-guided wMelOTU  
658 mutations. These data were collected in parallel with those presented in Fig. 1G and the  
659 WT dataset is shown again for reference.
- 660 H. Detailed view of the wMelOTU (pink) active site region and its coordination of the Ub  
661 C-terminus (red). Residues that coordinate Ub or stabilize the active site are shown with  
662 ball and stick representation.

663

664 **Figure 4. EschOTU structure shows altered sequence topology**

- 665 A. Cartoon representation of the 2.1 Å *E. albertii* EschOTU-Ub crystal structure with  
666 labeled termini and active site. Ub is hidden for this initial view of the OTU fold.
- 667 B. Structural alignment of the core OTU folds (central β-sheet and two supporting α-  
668 helices) from human OTUB1 (green, PDB 4DDG) and EschOTU (orange). Surrounding  
669 regions are less-well conserved and shown as semi-transparent.
- 670 C. Structural alignment of the core OTU folds (central β-sheet and two supporting α-  
671 helices) from CCHFV vOTU (blue, PDB 3PHW) and EschOTU (orange). Surrounding  
672 regions are less-well conserved and shown as semi-transparent.
- 673 D. Full view of EschOTU (orange) covalently bound to Ub (red) in the S1 site. Primary and  
674 secondary interactions with Ub are labeled, as well as the Ub Ile44 hydrophobic patch.

- 675 E. An aligned view as in D, showing S1 site interactions between human OTUB1 (green)  
676 and Ub (red) (PDB 4DDG). Ub is rotated 21° relative to the EschOTU-Ub structure, but  
677 maintains similar primary and secondary contacts.
- 678 F. An aligned view as in D, showing S1 site interactions between CCHFV vOTU (blue) and  
679 Ub (red) (PDB 3PHW). Ub is rotated by 95° relative to the EschOTU-Ub structure and  
680 displays swapped primary and secondary contacts.
- 681 G. Detailed view of the primary and secondary interfaces observed in the EschOTU-Ub  
682 structure. EschOTU (orange) and Ub (red) residues participating in the interface are  
683 shown with ball and stick representation.
- 684 H. Ub-KG(TAMRA) cleavage assay monitoring the effects of structure-guided EschOTU  
685 mutations. These data were collected in parallel with those presented in Fig. 1G and the  
686 WT dataset is shown again for clarity.
- 687 I. Detailed view of the EschOTU (orange) active site region and its coordination of the Ub  
688 C-terminus (red). Residues that coordinate Ub or stabilize the active site are shown with  
689 ball and stick representation.

690 **Figure 5. Cross-kingdom structural analysis of the OTU fold**

- 691 A. Cartoon representation of the EschOTU crystal structure colored in a rainbow gradient  
692 from N- to C-terminus. The catalytic triad residues are marked on both the structure and  
693 the linear color gradient above, showing their positions with respect to each other and the  
694 overall OTU sequence. The black and grey arrows relate how the EschOTU fold is  
695 permuted with respect to other OTUs. The black open arrow marks the open N- and C-  
696 termini, while the closed grey arrow marks a closed loop. OTU subfamilies that follow  
697 this overall sequence topology are listed in the lower right. This arrangement is only  
698 observed in EschOTU.
- 699 B. As in A, for the human OTUB1 structure (PDB 4DDG). The closed black arrow marks a  
700 closed loop, while the open grey arrow marks the open N- and C-termini. This  
701 arrangement is representative of the human Otubain, OTUD, and OTULIN subfamilies,  
702 as well as vOTUs.
- 703 C. As in A, for the human Cezanne structure (PDB 5LRW). This arrangement is  
704 representative of the human A20 subfamily, viral PLP2, and *Legionella ceg23*.



- 705 D. Cartoon representation of the CCHFV vOTU crystal structure (PDB 3PHW) colored in a  
706 rainbow gradient from N- to C-terminus. The catalytic triad residues are marked on both  
707 the structure and the linear color gradient above, showing their positions with respect to  
708 each other and the overall OTU sequence. The closed black arrow marks a closed loop,  
709 while the open grey arrow marks the open N- and C-termini. A schematic for the  
710 permuted vOTU<sup>P</sup> variant is shown to illustrate how it relates to the native sequence  
711 topology.
- 712 E. Ub-PA activity-based probe assay for WT vOTU and sequence-permuted vOTU<sup>P</sup>.  
713 Strong reactivity is indicated with asterisks.
- 714 F. Ub-KG(TAMRA) cleavage assay monitored by fluorescence polarization for WT vOTU  
715 and sequence-permuted vOTU<sup>P</sup>.

716

717 **Figure 6. A framework for understanding the S1 site of OTU domains**

- 718 A. Cartoon representation of the OTU fold (vOTU, PDB 3PHW), with the active site and S1  
719 site indicated. The S1 site is composed of a common region (CR, red) surrounded by  
720 three variable regions (VR, blue) that are responsible for Ub binding.
- 721 B. Comparison of structural adaptations in the VR1 arm region of the S1 site. VR1 has been  
722 observed to contribute to Ub binding as either a short  $\alpha$ -helical segment (left), and  
723 extended  $\alpha$ -helical region (center), or a  $\beta$ -hairpin (right). Examples of OTUs that follow  
724 each arrangement are provided to the right.
- 725 C. Comparison of structural adaptations in the VR2 central  $\beta$ -sheet edge of the S1 site. VR2  
726 has been observed to contribute to Ub binding in its most common arrangement (left),  
727 with additional or fewer  $\beta$ -strands (center), or altered with additional substructure (right).  
728 Examples of OTUs that follow each arrangement are provided to the right.
- 729 D. Comparison of structural adaptations in the VR3 loop extending from the central  $\beta$ -sheet.  
730 This VR3 loop has been observed as short and not utilized in Ub binding (left), expanded  
731 and participating in unstructured interactions with Ub (center), or expanded with a  $\beta$ -  
732 hairpin motif that binds Ub (right). Examples of OTUs that follow each arrangement are  
733 provided to the right.

734

735 **EXTENDED VIEW FIGURE LEGENDS**

736

737 **Extended View Figure 1. Prediction and validation of OTU DUBs from bacteria**

738 A. Full fluorescent Ub substrate cleavage data for all bacterial OTUs following Ala  
739 substitution at each member of the predicted catalytic triad. These data were collected in  
740 parallel with those presented in Fig. 1G and the WT dataset is shown again for clarity.

741

742 **Extended View Figure 2. Substrate specificity profiling of bacterial OTU DUBs**

- 743 A. Corrected Ub/Ub-like substrate specificity assays for all bacterial OTUs.  
744 B. Ub chain specificity assays for EschOTU, ceg7, ChlaOTU, RickOTU, wPipOTU, and  
745 ceg23 toward the eight diUb linkages. Reaction samples were quenched at the indicated  
746 timepoints, resolved by SDS-PAGE, and visualized by Coomassie staining.  
747 C. K11 diUb cleavage assay for BurkOTU WT and Ala-substituted catalytic triad mutants.  
748 Reaction samples were quenched at the indicated timepoints, resolved by SDS-PAGE,  
749 and visualized by Coomassie staining.

750

751 **Extended View Figure 3. wMelOTU structure reveals novel Ub embrace mechanism**

- 752 A. Cartoon representation of the 1.5 Å *W. pipientis* wMelOTU crystal structure with  
753 representative  $2|F_o|-|F_c|$  electron density contoured at  $1\sigma$ . Electron density is shown for  
754 catalytic triad residues as well as either edge of regions lacking interpretable density.  
755 B. Structural alignment of the core OTU folds (central  $\beta$ -sheet and two supporting  $\alpha$ -  
756 helices) from CCHFV vOTU (blue, PDB 3PHW) and wMelOTU (purple). Surrounding  
757 regions are less-well conserved and shown as semi-transparent.  
758 C. Cartoon representation of the 1.8 Å *W. pipientis* wMelOTU-Ub crystal structure with  
759 representative  $2|F_o|-|F_c|$  electron density contoured at  $1\sigma$ . Electron density is shown for  
760 the wMelOTU catalytic triad residues, the Ub C-terminus, the two wMelOTU  $\beta$ -hairpin  
761 regions that form the Ub embrace.

762 D. Cartoon representation of the wMelOTU-Ub crystal structure (pink/red) overlaid with the  
763 bound Ub molecules from the OTUB1:Ub structure (green, PDB 4DDG) and the CCHFV  
764 vOTU-Ub structure (blue, PDB 3PHW). The OTUB1- and vOTU-bound Ub molecules  
765 are rotated by 167° and 107°, respectively, in relation to the wMelOTU-bound Ub.  
766

767 **Extended View Figure 4. EschOTU structure shows altered sequence topology**

- 768 A. Detailed view of the active site in the EschOTU-Ub crystal structure with representative  
769  $2|F_o|-|F_c|$  electron density contoured at  $1\sigma$ . Electron density is shown for the EschOTU  
770 active site as well as the Ub C-terminus and EschOTU residues that coordinate it.  
771 B. Transparent surface representation of the EschOTU-Ub crystal structure (orange/red)  
772 showing insertion of the N-terminus from a symmetry-related molecule (yellow) with  
773  $2|F_o|-|F_c|$  electron density contoured at  $1\sigma$ .  
774 C. Detailed view of the EschOTU N-terminal insertion from a symmetry-related molecule  
775 (yellow), and contacts to EschOTU (orange) and Ub (red).  
776 D. Ub-KG(TAMRA) cleavage assay showing little effect on activity following removal of  
777 the N-terminal region (residues 184-194).

778

779 **Extended View Figure 5. Cross-kingdom structural analysis of the OTU fold**

- 780 A. Cartoon representation of the CE clan, human adenovirus 2 proteinase crystal structure  
781 (PDB 1AVP) colored in a rainbow gradient from N- to C-terminus. The catalytic triad  
782 residues are marked on both the structure and the linear color gradient above, showing  
783 their positions with respect to each other and the overall sequence.  
784 B. Structural alignment of the core protease folds (central  $\beta$ -sheet and two supporting  $\alpha$ -  
785 helices) from human adenovirus proteinase 2 of the CE clan (light blue, PDB 1AVP) and  
786 EschOTU (orange). Surrounding regions are less-well conserved and shown as semi-  
787 transparent.

788

789 **Extended View Figure 6. A framework for understanding the S1 site of OTU domains**

- 790 A. Examples of Ub interaction surfaces contacted by OTU VR1 arm regions in the S1 site.  
791 OTUB1 (left) and EschOTU (center) contact the Ub Ile44 hydrophobic patch (blue),  
792 while wMelOTU (right) contacts the Ile36 hydrophobic patch (green).
- 793 B. Examples of Ub interaction surfaces contacted by OTU VR2  $\beta$ -sheet edges in the S1 site.  
794 OTUB1 (left) contacts the Ub Ile36 hydrophobic patch (green), while wMelOTU (center)  
795 reaches to the Asp58 acidic patch (red) and CCHFV vOTU (right) contacts the Ile44  
796 hydrophobic patch (blue).
- 797 C. Examples of Ub interaction surfaces contacted by OTU VR3 loops in the S1 site.  
798 EschOTU (left), with its short VR3, makes no Ub contacts, while wMelOTU (center)  
799 contacts the Ub Ile44 hydrophobic patch (blue) and Cezanne (right) contacts the Ile36  
800 hydrophobic patch (green).

801

## 802 REFERENCES

- 803 Adams PD, Afonine PV, Bunkóczi G, Chen VB, Davis IW, Echols N, Headd JJ, Hung L-W,  
804 Kapral GJ, Grosse-Kunstleve RW, McCoy AJ, Moriarty NW, Oeffner R, Read RJ,  
805 Richardson DC, Richardson JS, Terwilliger TC & Zwart PH (2010) PHENIX: a  
806 comprehensive Python-based system for macromolecular structure solution. *Acta*  
807 *Crystallogr. D Biol. Crystallogr.* **66**: 213–221
- 808 Akutsu M, Ye Y, Virdee S, Chin JW & Komander D (2011) Molecular basis for ubiquitin and  
809 ISG15 cross-reactivity in viral ovarian tumor domains. *Proc. Natl. Acad. Sci. U.S.A.* **108**:  
810 2228–2233
- 811 Altun M, Walter TS, Kramer HB, Herr P, Iphöfer A, Boström J, David Y, Komsany A, Ternette  
812 N, Navon A, Stuart DI, Ren J & Kessler BM (2015) The human otubain2-ubiquitin structure  
813 provides insights into the cleavage specificity of poly-ubiquitin-linkages. *PLoS ONE* **10**:  
814 e0115344
- 815 Anderson DM, Schmalzer KM, Sato H, Casey M, Terhune SS, Haas AL, Feix JB & Frank DW  
816 (2011) Ubiquitin and ubiquitin-modified proteins activate the *Pseudomonas aeruginosa*  
817 T3SS cytotoxin, ExoU. *Mol. Microbiol.* **82**: 1454–1467
- 818 Bailey-Elkin BA, van Kasteren PB, Snijder EJ, Kikkert M & Mark BL (2014) Viral OTU  
819 deubiquitinases: a structural and functional comparison. *PLoS Pathog.* **10**: e1003894
- 820 Barrett AJ & Rawlings ND (1996) Families and clans of cysteine peptidases. *Perspectives in*  
821 *Drug Discovery and Design* **6**: 1–11

- 822 Basters A, Geurink PP, Oualid El F, Ketscher L, Casutt MS, Krause E, Ovaa H, Knobeloch K-P  
823 & Fritz G (2014) Molecular characterization of ubiquitin-specific protease 18 reveals  
824 substrate specificity for interferon-stimulated gene 15. *FEBS J.* **281**: 1918–1928
- 825 Berrow NS, Alderton D, Sainsbury S, Nettleship J, Assenberg R, Rahman N, Stuart DI & Owens  
826 RJ (2007) A versatile ligation-independent cloning method suitable for high-throughput  
827 expression screening applications. *Nucleic Acids Res.* **35**: e45–e45
- 828 Bucher P, Karplus K, Moeri N & Hofmann K (1996) A flexible motif search technique based on  
829 generalized profiles. *Comput. Chem.* **20**: 3–23
- 830 Du J, Fu L, Sui Y & Zhang L (2019) The function and regulation of OTU deubiquitinases. *Front*  
831 *Med* **81**: 203–22
- 832 Dzimianski JV, Beldon BS, Daczkowski CM, Goodwin OY, Scholte FEM, Bergeron É & Pegan  
833 SD (2019) Probing the impact of nairovirus genomic diversity on viral ovarian tumor  
834 domain protease (vOTU) structure and deubiquitinase activity. *PLoS Pathog.* **15**: e1007515
- 835 Ebner P, Versteeg GA & Ikeda F (2017) Ubiquitin enzymes in the regulation of immune  
836 responses. *Crit. Rev. Biochem. Mol. Biol.* **52**: 425–460
- 837 Ekkebus R, van Kasteren SI, Kulathu Y, Scholten A, Berlin I, Geurink PP, de Jong A, Goerdalay  
838 S, Neefjes J, Heck AJR, Komander D & Ovaa H (2013) On terminal alkynes that can react  
839 with active-site cysteine nucleophiles in proteases. *J. Am. Chem. Soc.* **135**: 2867–2870
- 840 Emsley P, Lohkamp B, Scott WG & Cowtan K (2010) Features and development of Coot. *Acta*  
841 *Crystallogr. D Biol. Crystallogr.* **66**: 486–501
- 842 Evans PR & Murshudov GN (2013) How good are my data and what is the resolution? *Acta*  
843 *Crystallogr. D Biol. Crystallogr.* **69**: 1204–1214
- 844 Fischer A, Harrison KS, Ramirez Y, Auer D, Chowdhury SR, Prusty BK, Sauer F, Dimond Z,  
845 Kisker C, Hefty PS & Rudel T (2017) Chlamydia trachomatis-containing vacuole serves as  
846 deubiquitination platform to stabilize Mcl-1 and to interfere with host defense. *Elife* **6**: 6192
- 847 Fox NK, Brenner SE & Chandonia J-M (2014) SCOPe: Structural Classification of Proteins--  
848 extended, integrating SCOP and ASTRAL data and classification of new structures. *Nucleic*  
849 *Acids Res.* **42**: D304–9
- 850 Frias-Staheli N, Giannakopoulos NV, Kikkert M, Taylor SL, Bridgen A, Paragas J, Richt JA,  
851 Rowland RR, Schmaljohn CS, Lenschow DJ, Snijder EJ, García-Sastre A & Virgin HW  
852 (2007) Ovarian tumor domain-containing viral proteases evade ubiquitin- and ISG15-  
853 dependent innate immune responses. *Cell Host Microbe* **2**: 404–416
- 854 Furtado AR, Essid M, Perrinet S, Balañá ME, Yoder N, Dehoux P & Subtil A (2013) The  
855 chlamydial OTU domain-containing protein ChlaOTU is an early type III secretion effector  
856 targeting ubiquitin and NDP52. *Cell. Microbiol.* **15**: 2064–2079

- 857 Geurink PP, Oualid El F, Jonker A, Hameed DS & Ovaa H (2012) A general chemical ligation  
858 approach towards isopeptide-linked ubiquitin and ubiquitin-like assay reagents.  
859 *Chembiochem* **13**: 293–297
- 860 Haakonsen DL & Rape M (2019) Branching Out: Improved Signaling by Heterotypic Ubiquitin  
861 Chains. *Trends Cell Biol.* **29**: 704–716
- 862 Huang OW, Ma X, Yin J, Flinders J, Maurer T, Kayagaki N, Phung Q, Bosanac I, Arnott D,  
863 Dixit VM, Hymowitz SG, Starovasnik MA & Cochran AG (2012) Phosphorylation-  
864 dependent activity of the deubiquitinase DUBA. *Nat. Struct. Mol. Biol.* **19**: 171–175
- 865 Juang Y-C, Landry M-C, Sanches M, Vittal V, Leung CCY, Ceccarelli DF, Mateo A-RF,  
866 Pruneda JN, Mao DYL, Szilard RK, Orlicky S, Munro M, Brzovic PS, Klevit RE, Sicheri F  
867 & Durocher D (2012) OTUB1 co-opts Lys48-linked ubiquitin recognition to suppress E2  
868 enzyme function. *Mol. Cell* **45**: 384–397
- 869 Kabsch W (2010) XDS. *Acta Crystallogr. D Biol. Crystallogr.* **66**: 125–132
- 870 Katoh K, Misawa K, Kuma K-I & Miyata T (2002) MAFFT: a novel method for rapid multiple  
871 sequence alignment based on fast Fourier transform. *Nucleic Acids Res.* **30**: 3059–3066
- 872 Kelley LA, Mezulis S, Yates CM, Wass MN & Sternberg MJE (2015) The Phyre2 web portal for  
873 protein modeling, prediction and analysis. *Nat Protoc* **10**: 845–858
- 874 Keusekotten K, Elliott PR, Glockner L, Fiil BK, Damgaard RB, Kulathu Y, Wauer T,  
875 Hospenthal MK, Gyrð-Hansen M, Krappmann D, Hofmann K & Komander D (2013)  
876 OTULIN antagonizes LUBAC signaling by specifically hydrolyzing Met1-linked  
877 polyubiquitin. *Cell* **153**: 1312–1326
- 878 Komander D & Barford D (2008) Structure of the A20 OTU domain and mechanistic insights  
879 into deubiquitination. *Biochem. J.* **409**: 77–85
- 880 Komander D & Rape M (2012) The Ubiquitin Code. *Annu. Rev. Biochem.* **81**: 203–229
- 881 Konagurthu AS, Reboul CF, Schmidberger JW, Irving JA, Lesk AM, Stuckey PJ, Whisstock JC  
882 & Buckle AM (2010) MUSTANG-MR structural sieving server: applications in protein  
883 structural analysis and crystallography. *PLoS ONE* **5**: e10048
- 884 Kubori T, Kitao T, Ando H & Nagai H (2018) LotA, a Legionella deubiquitinase, has dual  
885 catalytic activity and contributes to intracellular growth. *Cell. Microbiol.* **20**: e12840
- 886 Licchesi JDF, Mieszczanek J, Mevissen TET, Rutherford TJ, Akutsu M, Virdee S, Oualid El F,  
887 Chin JW, Ovaa H, Bienz M & Komander D (2011) An ankyrin-repeat ubiquitin-binding  
888 domain determines TRABID's specificity for atypical ubiquitin chains. *Nat. Struct. Mol.*  
889 *Biol.* **19**: 62–71
- 890 Lin Y-H & Machner MP (2017) Exploitation of the host cell ubiquitin machinery by microbial  
891 effector proteins. *J. Cell. Sci.* **130**: 1985–1996

- 892 Lombardi C, Ayach M, Beaurepaire L, Chenon M, Andreani J, Guerois R, Jupin I & Bressanelli  
893 S (2013) A compact viral processing proteinase/ubiquitin hydrolase from the OTU family.  
894 *PLoS Pathog.* **9**: e1003560
- 895 Makarova KS, Aravind L & Koonin EV (2000) A novel superfamily of predicted cysteine  
896 proteases from eukaryotes, viruses and *Chlamydia pneumoniae*. *Trends in Biochemical*  
897 *Sciences* **25**: 50–52
- 898 McCoy AJ, Grosse-Kunstleve RW, Adams PD, Winn MD, Storoni LC & Read RJ (2007) Phaser  
899 crystallographic software. *J Appl Crystallogr* **40**: 658–674
- 900 Mesquita FS, Thomas M, Sachse M, Santos AJM, Figueira R & Holden DW (2012) The  
901 *Salmonella* deubiquitinase SseL inhibits selective autophagy of cytosolic aggregates. *PLoS*  
902 *Pathog.* **8**: e1002743
- 903 Messick TE, Russell NS, Iwata AJ, Sarachan KL, Shiekhattar R, Shanks JR, Reyes-Turcu FE,  
904 Wilkinson KD & Marmorstein R (2008) Structural basis for ubiquitin recognition by the  
905 Otul ovarian tumor domain protein. *J. Biol. Chem.* **283**: 11038–11049
- 906 Mevissen TET & Komander D (2017) Mechanisms of Deubiquitinase Specificity and  
907 Regulation. *Annu. Rev. Biochem.* **86**: 159–192
- 908 Mevissen TET, Hospenthal MK, Geurink PP, Elliott PR, Akutsu M, Arnaudo N, Ekkebus R,  
909 Kulathu Y, Wauer T, Oualid El F, Freund SMV, Ovaa H & Komander D (2013) OTU  
910 deubiquitinases reveal mechanisms of linkage specificity and enable ubiquitin chain  
911 restriction analysis. *Cell* **154**: 169–184
- 912 Mevissen TET, Kulathu Y, Mulder MPC, Geurink PP, maslen SL, Gersch M, Elliott PR, burke  
913 JE, van Tol BDM, Akutsu M, Oualid FE, kawasaki M, Freund SMV, Ovaa H & Komander  
914 D (2016) Molecular basis of Lys11-polyubiquitin specificity in the deubiquitinase Cezanne.  
915 *Nature* **538**: 402–405
- 916 Michel MA, Komander D & Elliott PR (2018) Enzymatic Assembly of Ubiquitin Chains.  
917 *Methods Mol. Biol.* **1844**: 73–84
- 918 Mittal R, Peak-Chew SY, Sade RS, Vallis Y & McMahon HT (2010) The acetyltransferase  
919 activity of the bacterial toxin YopJ of *Yersinia* is activated by eukaryotic host cell inositol  
920 hexakisphosphate. *J. Biol. Chem.* **285**: 19927–19934
- 921 Notredame C, Higgins DG & Heringa J (2000) T-Coffee: A novel method for fast and accurate  
922 multiple sequence alignment. *J. Mol. Biol.* **302**: 205–217
- 923 Popovic D, Vucic D & Dikic I (2014) Ubiquitination in disease pathogenesis and treatment. *Nat.*  
924 *Med.* **20**: 1242–1253
- 925 Pruneda JN & Komander D (2019) Evaluating enzyme activities and structures of DUBs. *Meth.*  
926 *Enzymol.* **618**: 321–341

- 927 Pruneda JN, Bastidas RJ, Bertoulaki E, Swatek KN, Santhanam B, Clague MJ, Valdivia RH,  
928 Urbé S & Komander D (2018) A Chlamydia effector combining deubiquitination and  
929 acetylation activities induces Golgi fragmentation. *Nat Microbiol* **3**: 1377–1384
- 930 Pruneda JN, Durkin CH, Geurink PP, Ovaa H, Santhanam B, Holden DW & Komander D (2016)  
931 The Molecular Basis for Ubiquitin and Ubiquitin-like Specificities in Bacterial Effector  
932 Proteases. *Mol. Cell* **63**: 261–276
- 933 Pruneda JN, Smith FD, Daurie A, Swaney DL, Villén J, Scott JD, Stadnyk AW, Le Trong I,  
934 Stenkamp RE, Klevit RE, Rohde JR & Brzovic PS (2014) E2~Ub conjugates regulate the  
935 kinase activity of Shigella effector OspG during pathogenesis. *EMBO J.* **33**: 437–449
- 936 Rawlings ND, Barrett AJ, Thomas PD, Huang X, Bateman A & Finn RD (2018) The MEROPS  
937 database of proteolytic enzymes, their substrates and inhibitors in 2017 and a comparison  
938 with peptidases in the PANTHER database. *Nucleic Acids Res.* **46**: D624–D632
- 939 Rytönen A, Poh J, Garmendia J, Boyle C, Thompson A, Liu M, Freemont P, Hinton JCD &  
940 Holden DW (2007) SseL, a Salmonella deubiquitinase required for macrophage killing and  
941 virulence. *Proc. Natl. Acad. Sci. U.S.A.* **104**: 3502–3507
- 942 Schneider CA, Rasband WS & Eliceiri KW (2012) NIH Image to ImageJ: 25 years of image  
943 analysis. *Nat. Methods* **9**: 671–675
- 944 Swatek KN & Komander D (2016) Ubiquitin modifications. *Cell Research* **26**: 399–422
- 945 van der Heden van Noort GJ, Kooij R, Elliott PR, Komander D & Ovaa H (2017) Synthesis of  
946 Poly-Ubiquitin Chains Using a Bifunctional Ubiquitin Monomer. *Org. Lett.* **19**: 6490–6493
- 947 van Kasteren PB, Bailey-Elkin BA, James TW, Ninaber DK, Beugeling C, Khajehpour M,  
948 Snijder EJ, Mark BL & Kikkert M (2013) Deubiquitinase function of arterivirus papain-like  
949 protease 2 suppresses the innate immune response in infected host cells. *Proc. Natl. Acad.  
950 Sci. U.S.A.* **110**: E838–47
- 951 Vijay-Kumar S, Bugg CE & Cook WJ (1987) Structure of ubiquitin refined at 1.8 Å resolution.  
952 *J. Mol. Biol.* **194**: 531–544
- 953 Wan M, Wang X, Huang C, Xu D, Wang Z, Zhou Y & Zhu Y (2019) A bacterial effector  
954 deubiquitinase specifically hydrolyses linear ubiquitin chains to inhibit host inflammatory  
955 signalling. *Nat Microbiol* **22**: 159
- 956 Wilkinson KD, Gan-Erdene T & Kolli N (2005) Derivatization of the C-terminus of ubiquitin  
957 and ubiquitin-like proteins using intein chemistry: methods and uses. *Meth. Enzymol.* **399**:  
958 37–51
- 959 Wimmer P & Schreiner S (2015) Viral Mimicry to Usurp Ubiquitin and SUMO Host Pathways.  
960 *Viruses* **7**: 4854–4872



961 Winter G, Waterman DG, Parkhurst JM, Brewster AS, Gildea RJ, Gerstel M, Fuentes-Montero  
962 L, Vollmar M, Michels-Clark T, Young ID, Sauter NK & Evans G (2018) DIALS:  
963 implementation and evaluation of a new integration package. *Acta Crystallogr D Struct Biol*  
964 **74**: 85–97

965

# Fig 1. Prediction and validation of OTU DUBs from bacteria

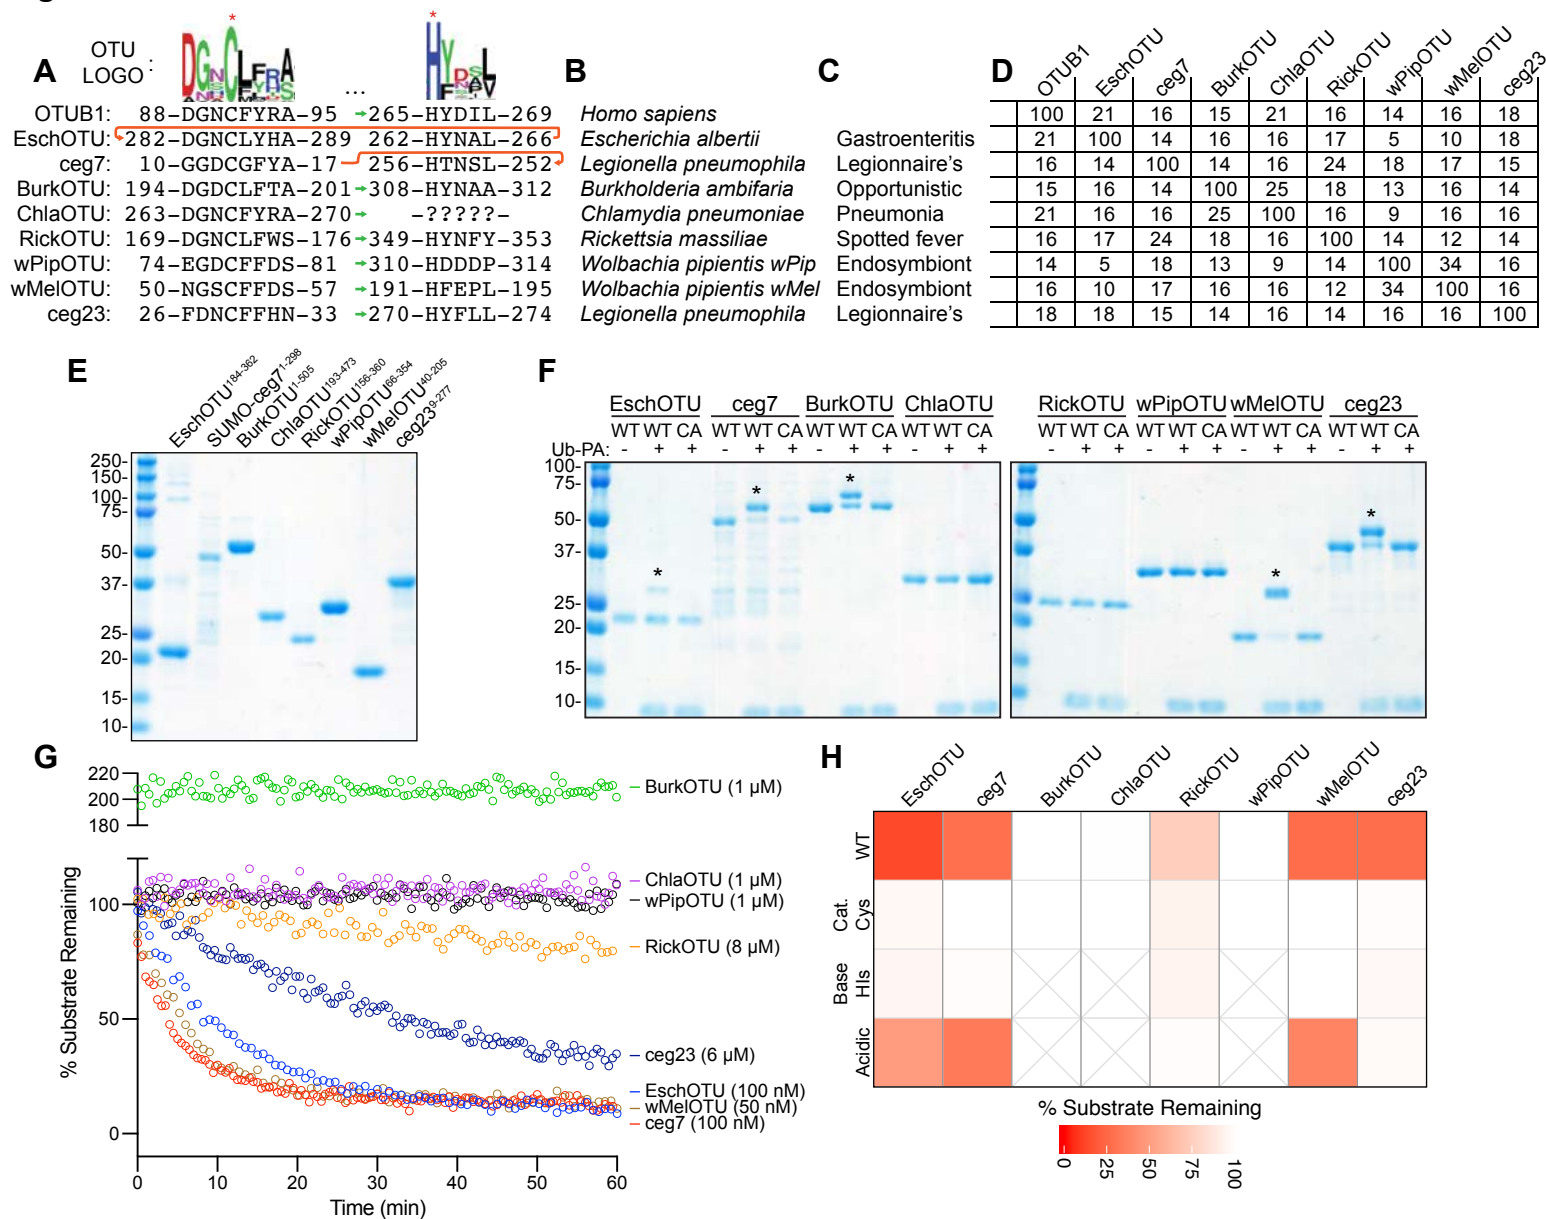

## Fig 2. Substrate specificity profiling of bacterial OTU DUBs

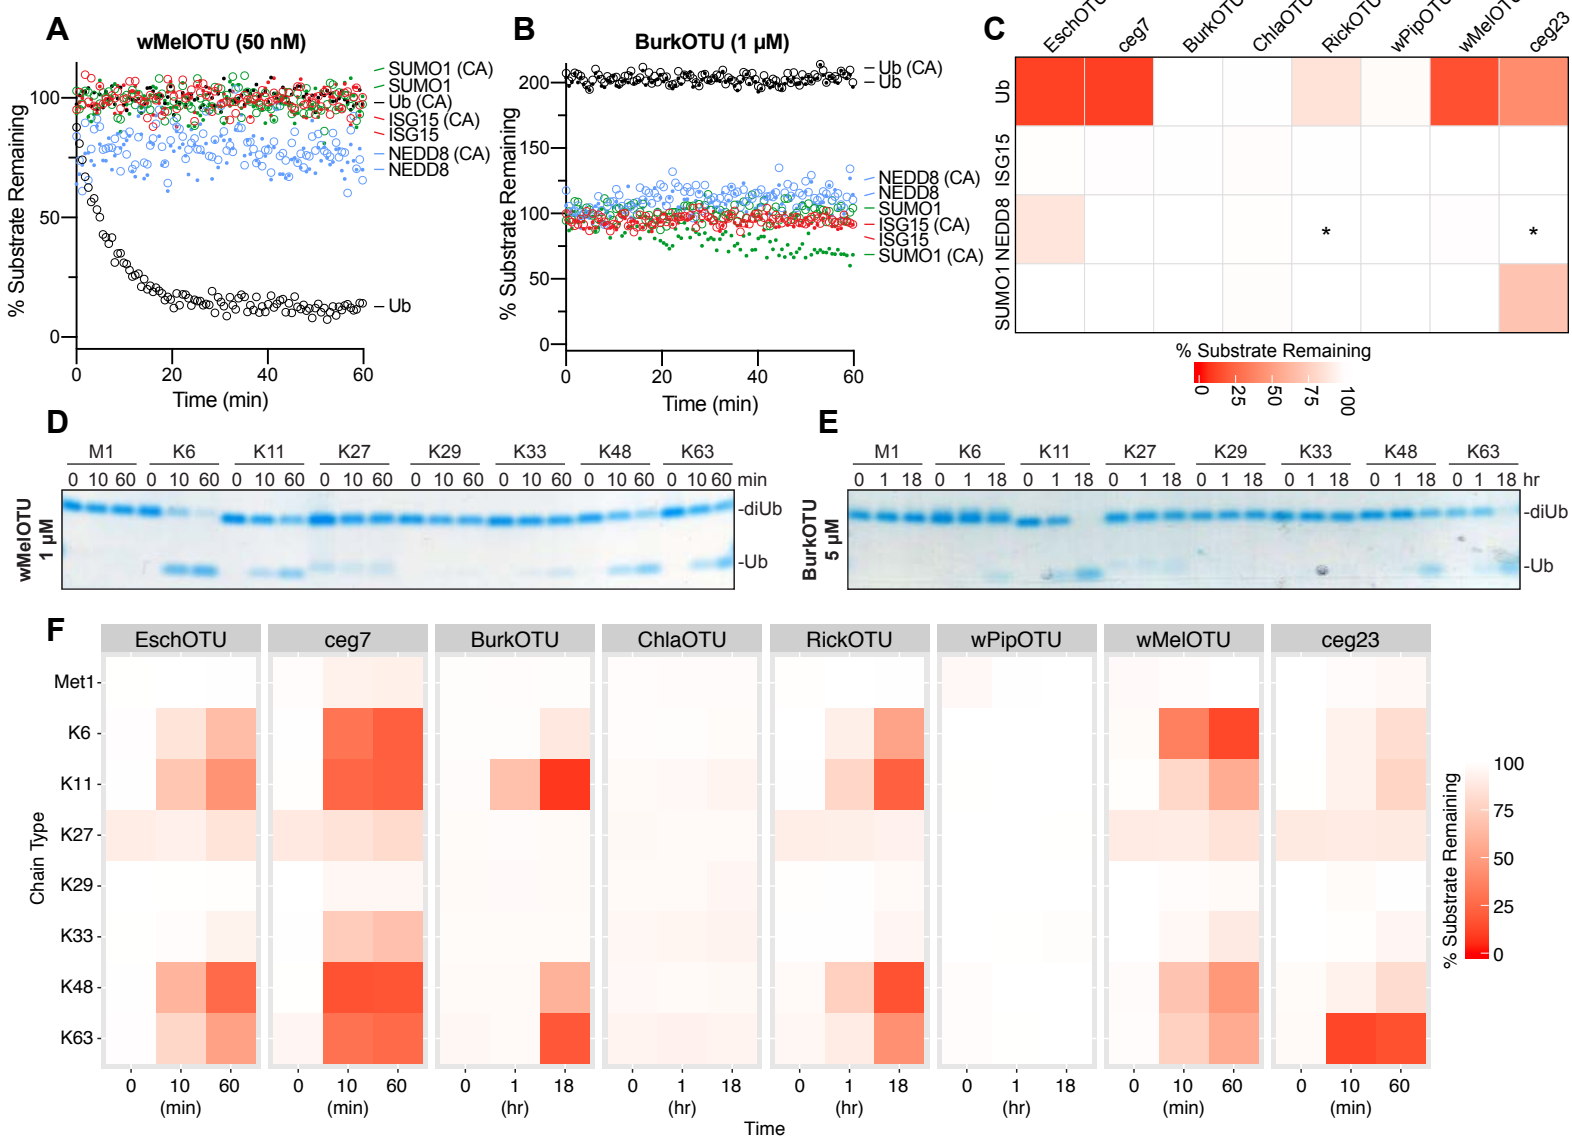

### Fig 3. wMeIOTU structure reveals novel Ub embrace mechanism

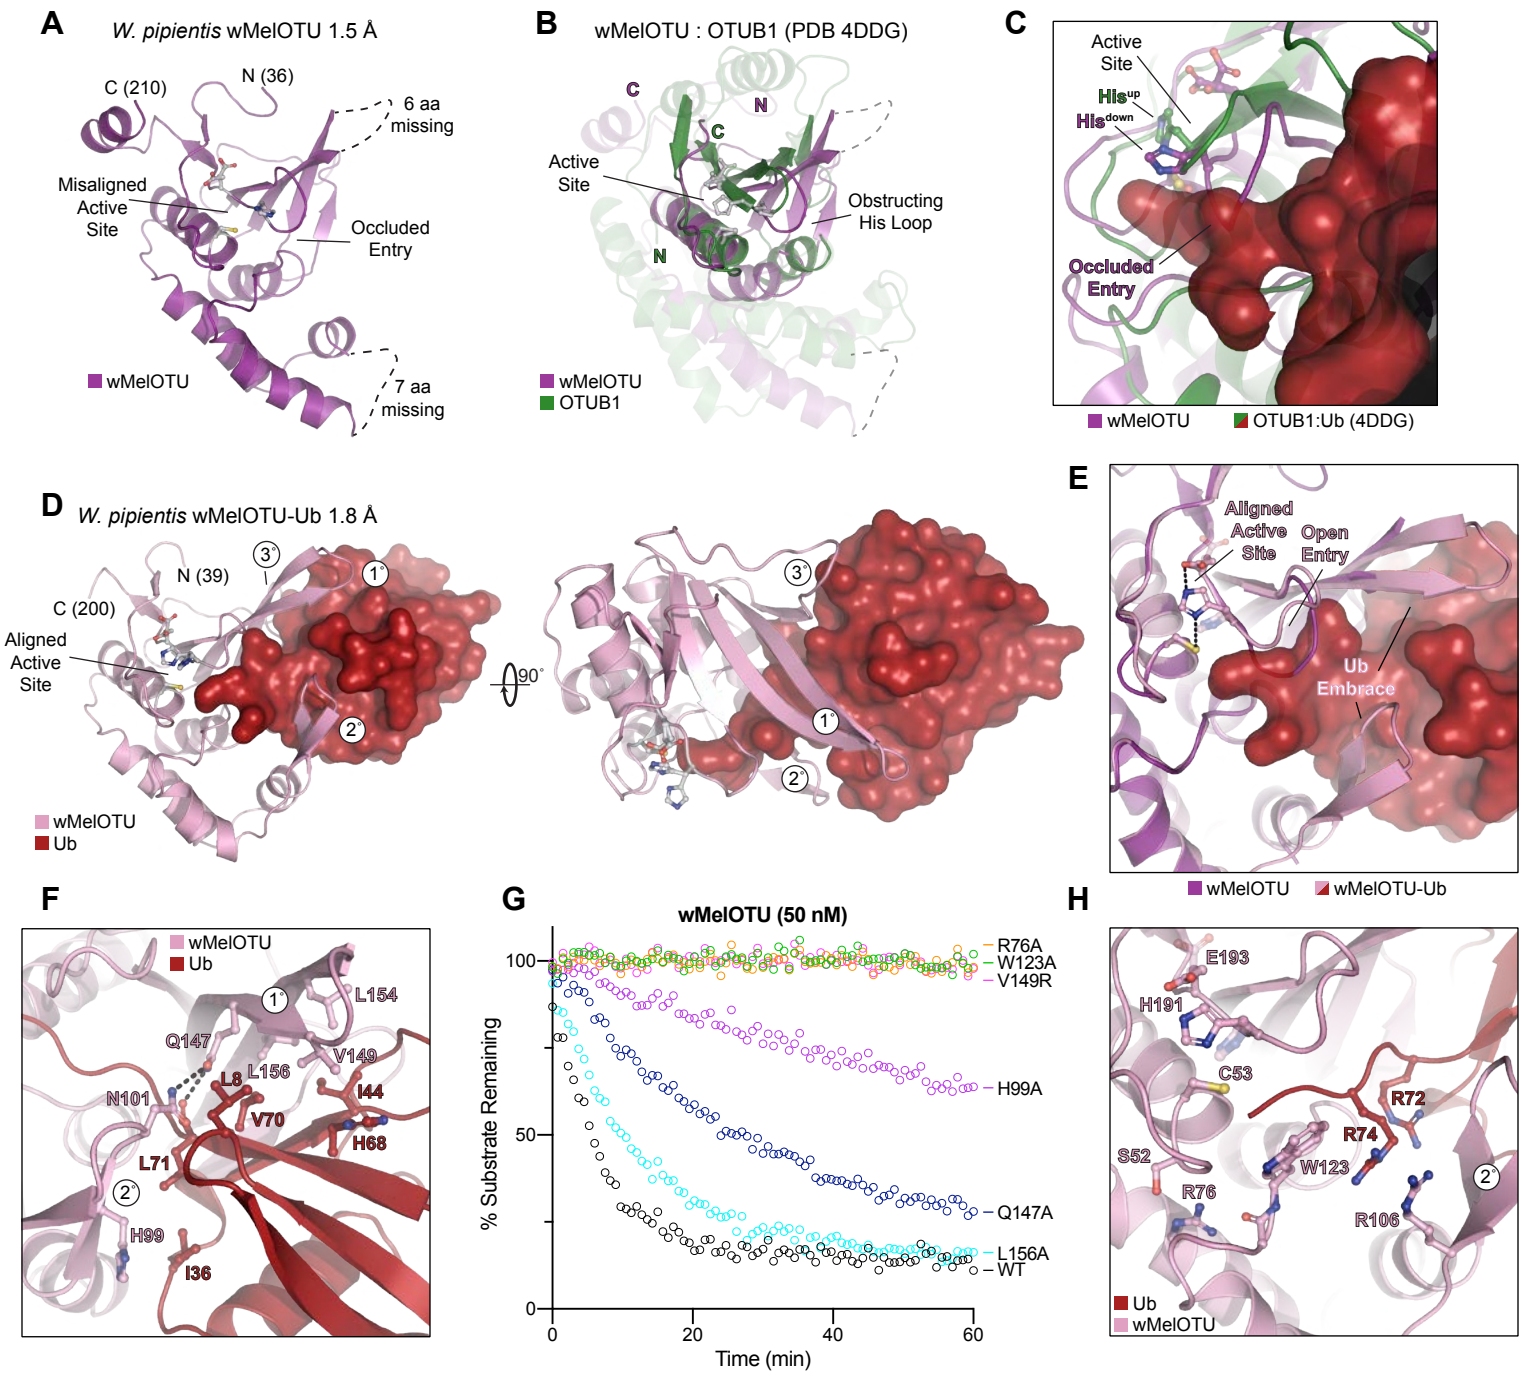

### Fig 4. EschOTU structure shows altered sequence topology

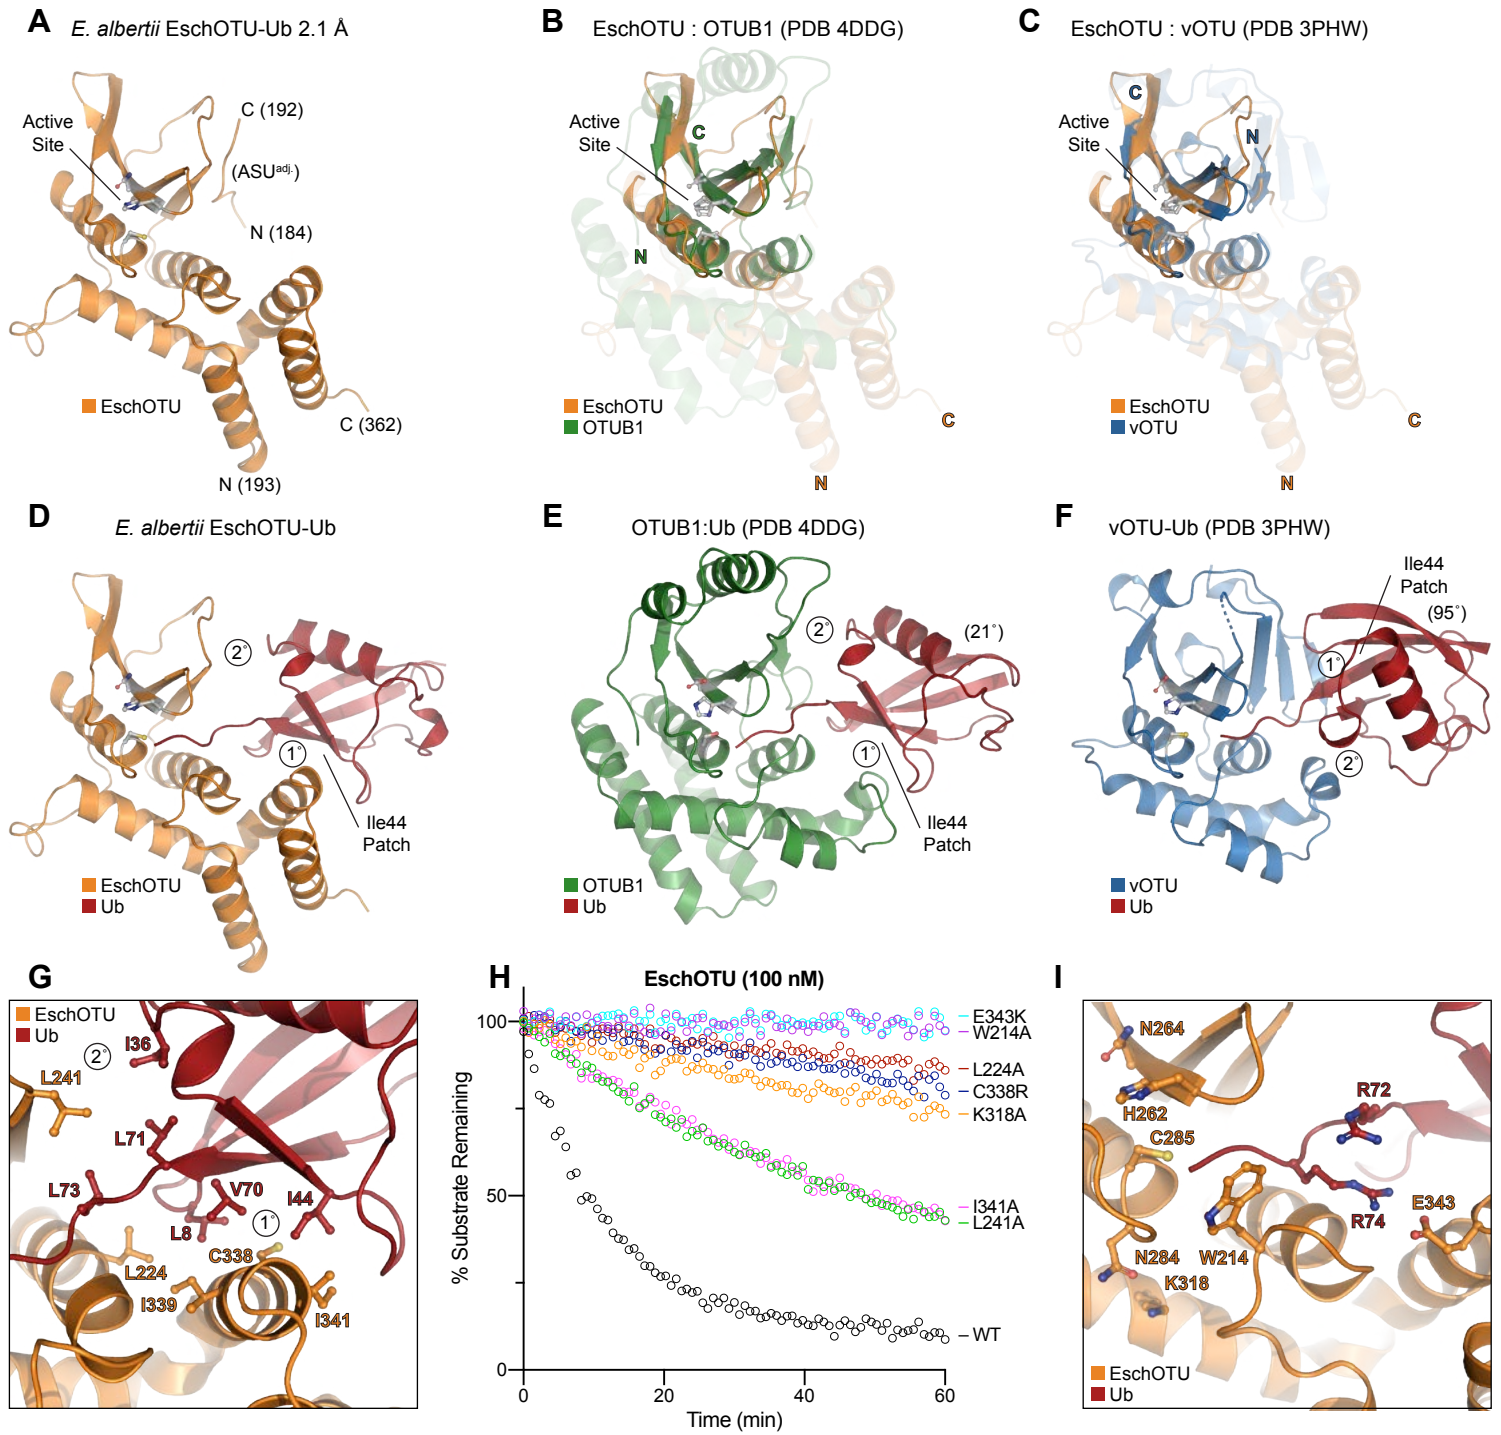

## Fig 5. Cross-kingdom structural analysis of the OTU fold

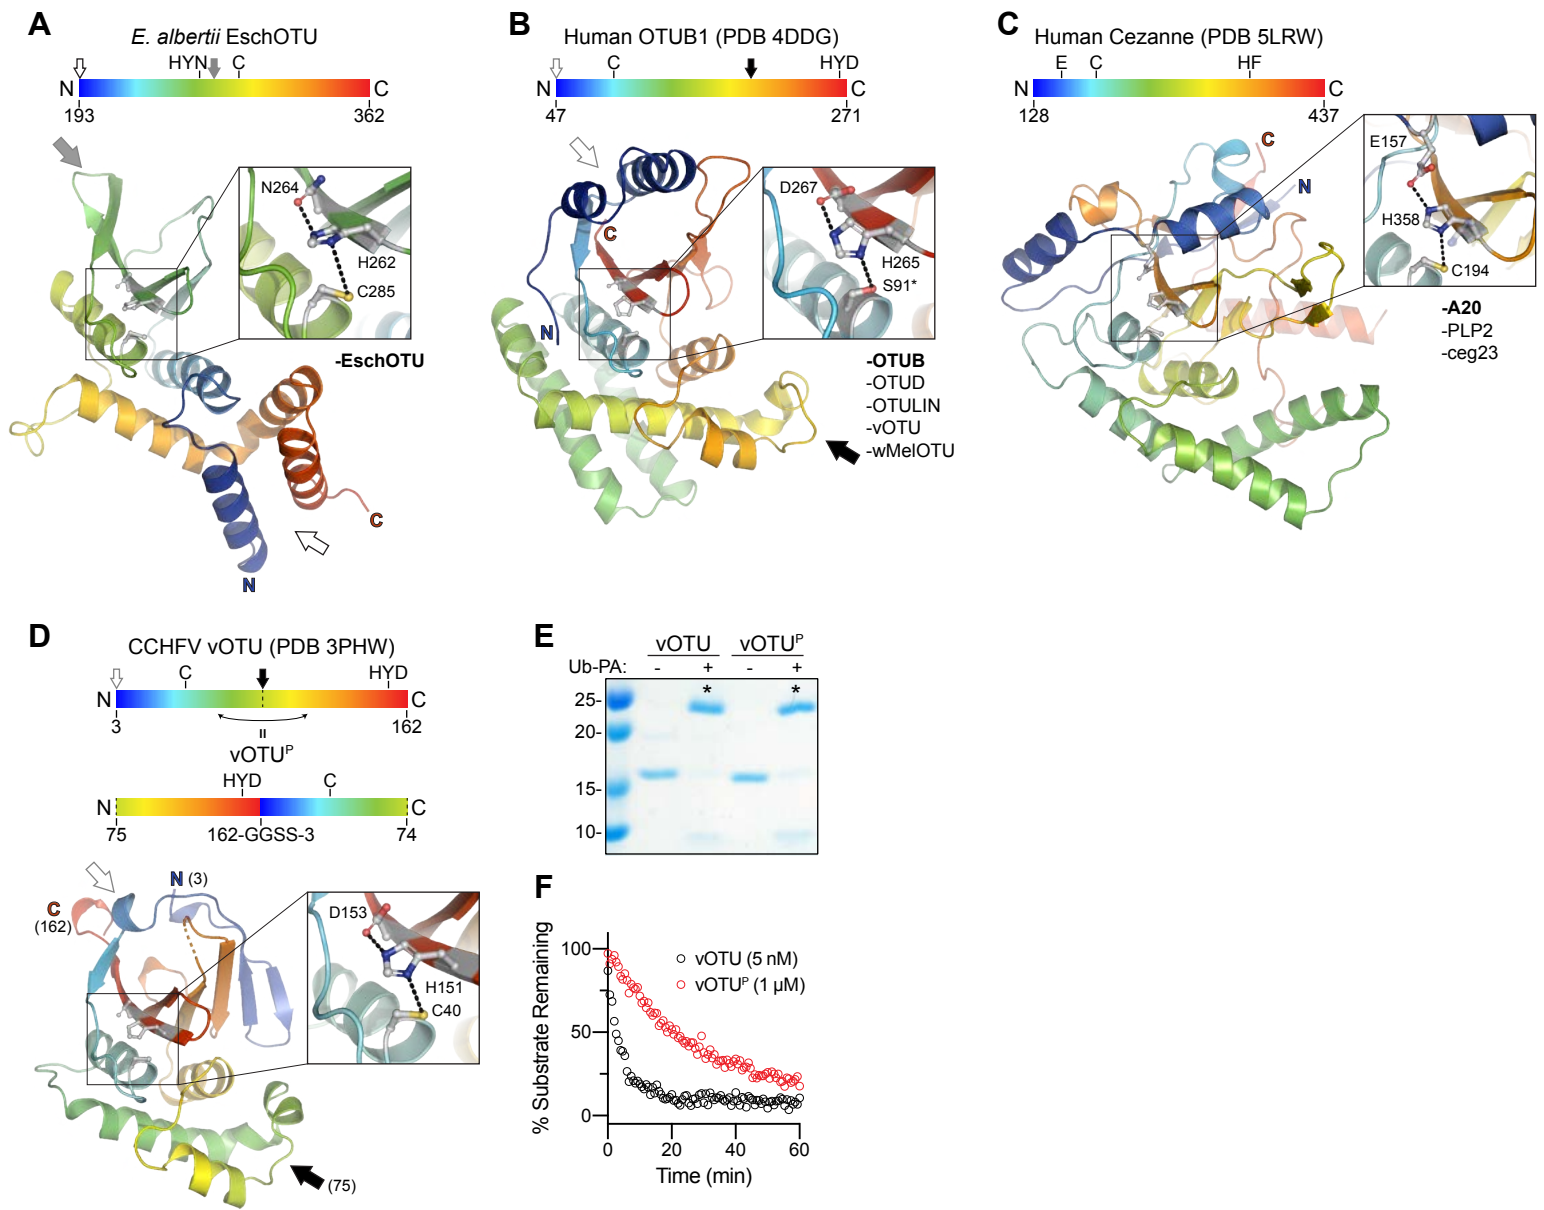

## Fig 6. A framework for understanding the S1 site of OTU domains

**A**

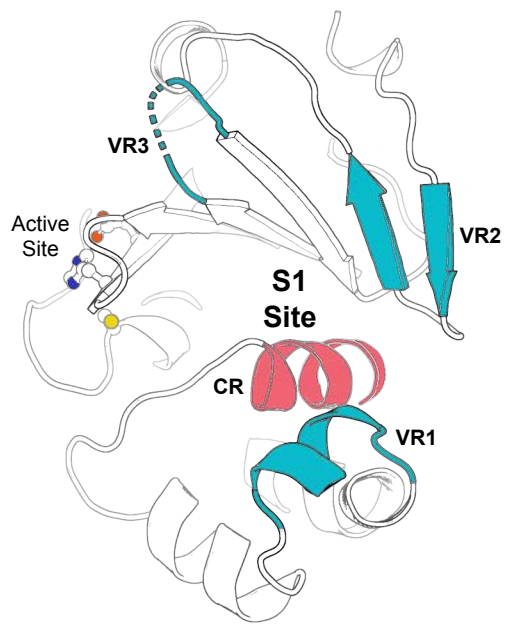

**B**

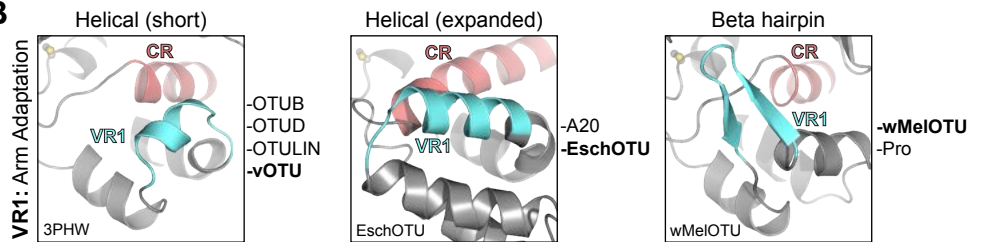

**C**

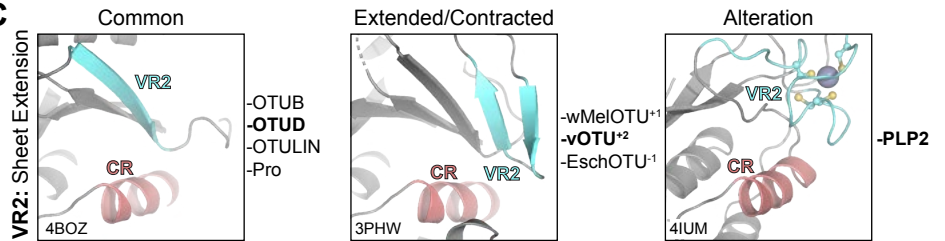

**D**

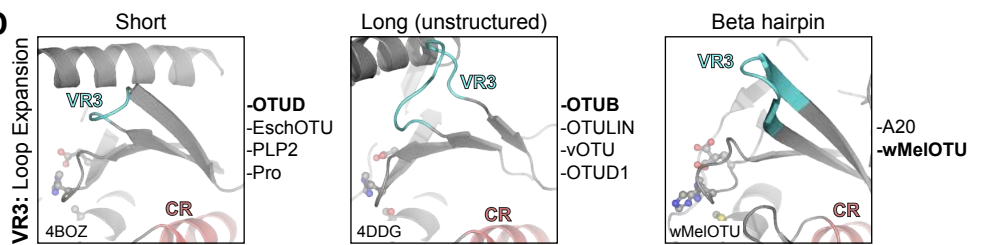

# Fig EV1. Prediction and validation of OTU DUBs from bacteria

**A**

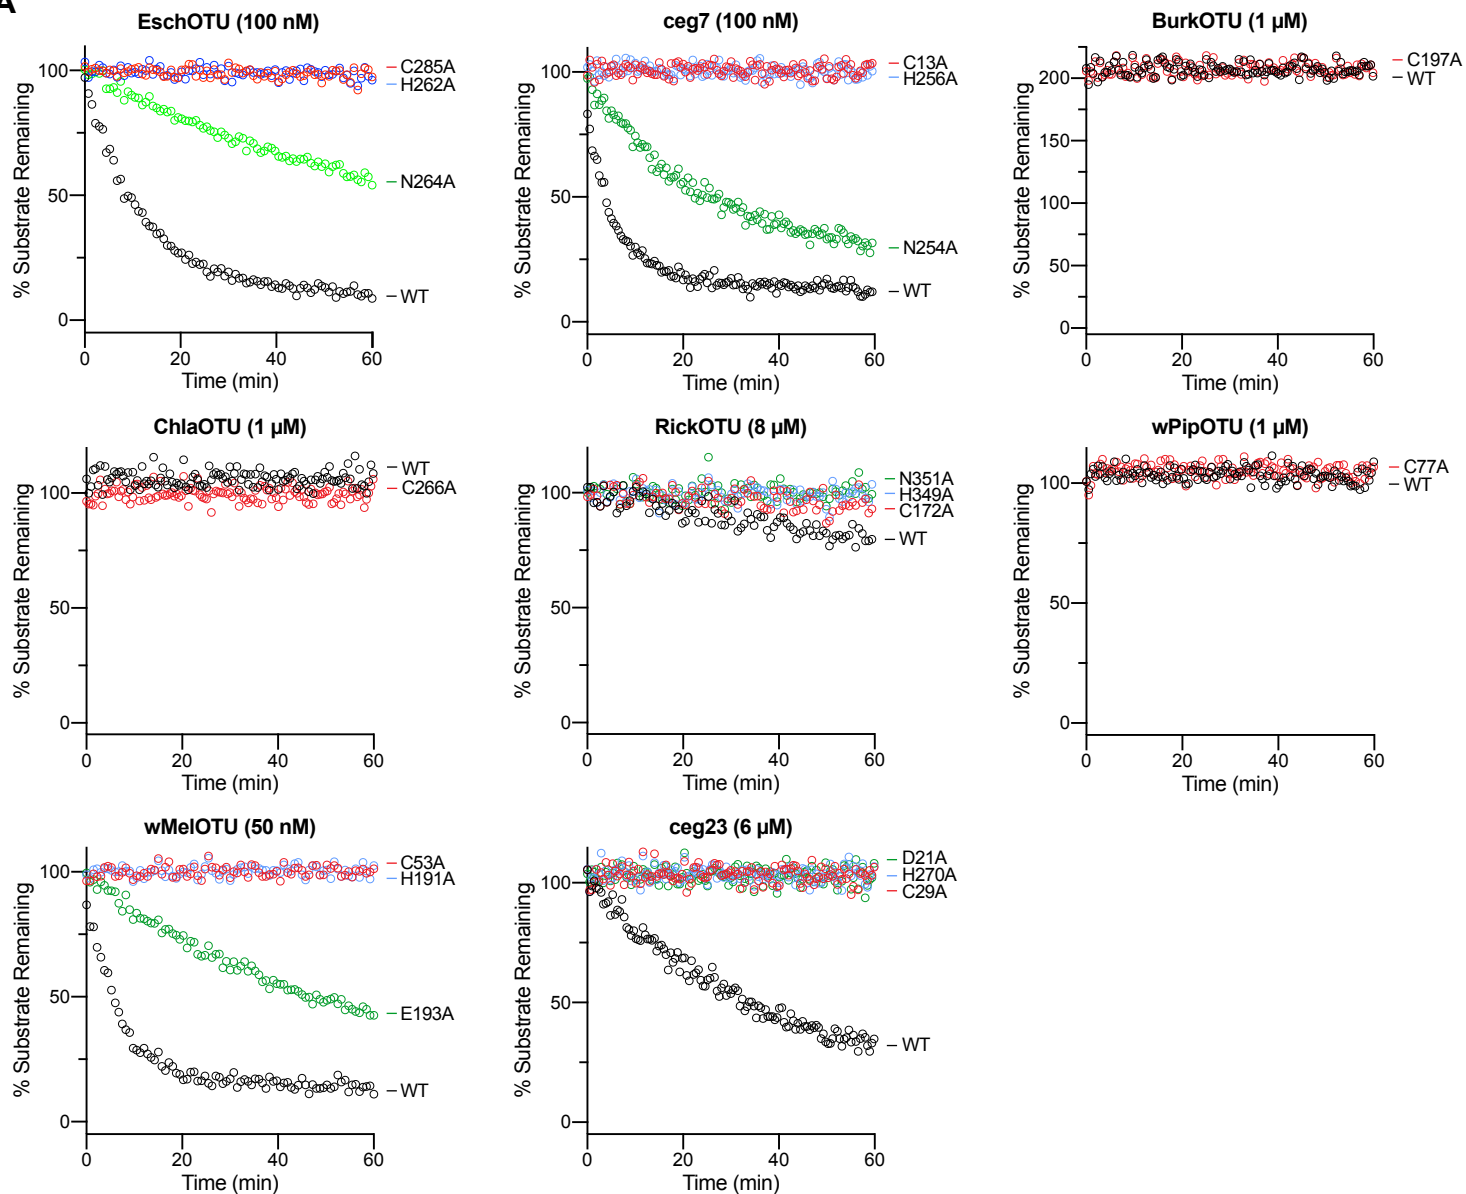



## Fig EV2. Substrate specificity profiling of bacterial OTU DUBs

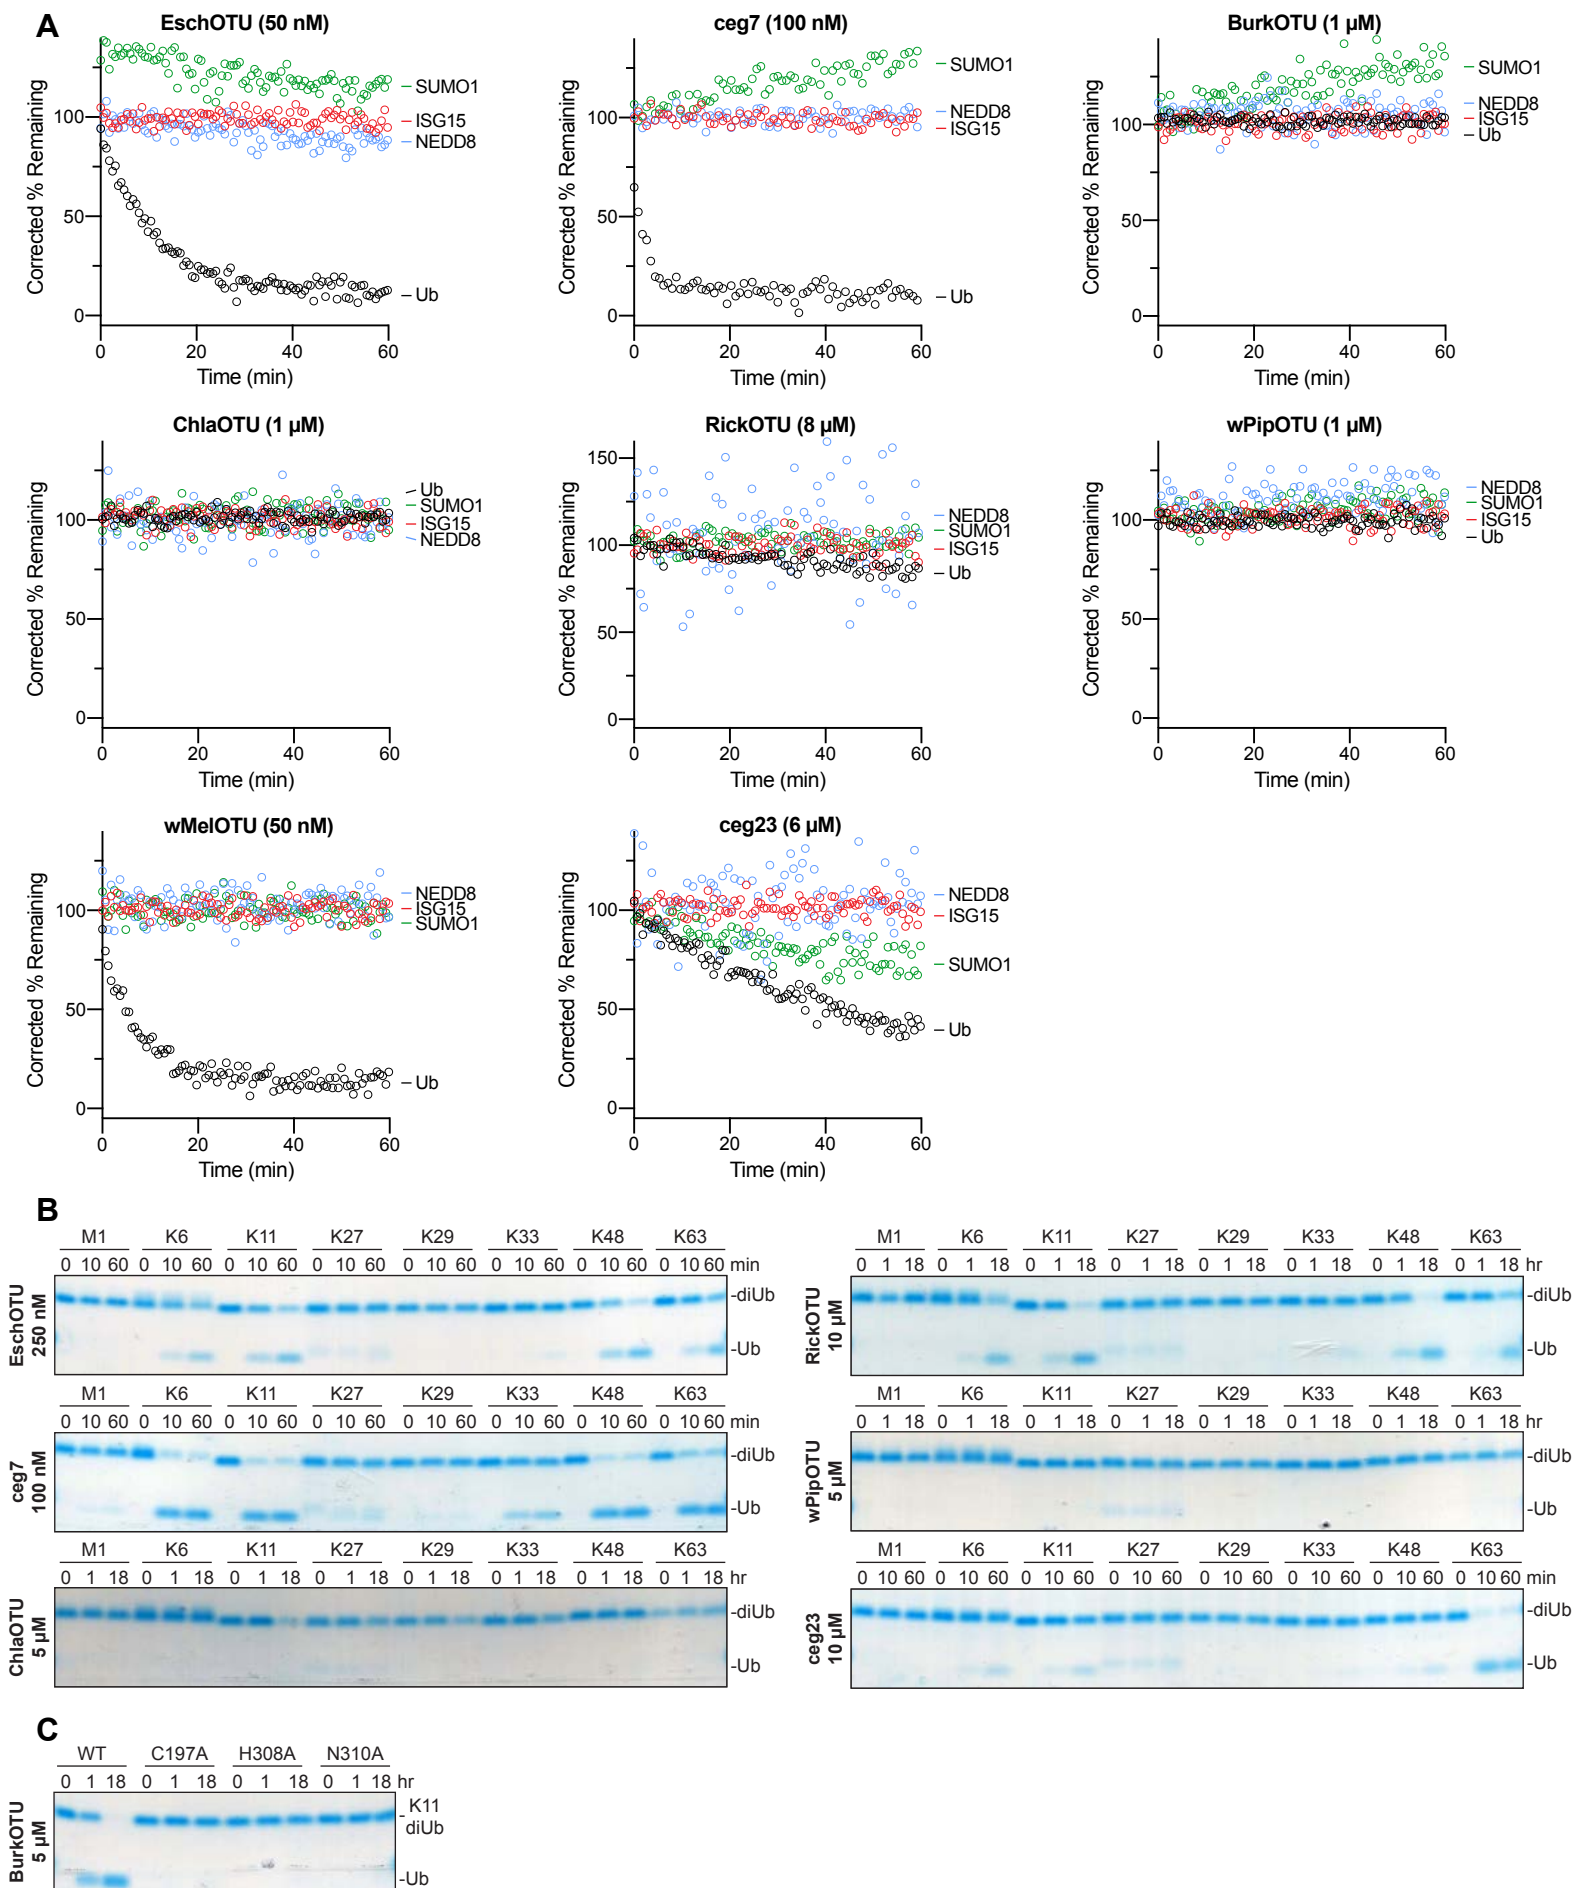

# Fig EV3. wMeIOTU structure reveals novel Ub embrace mechanism

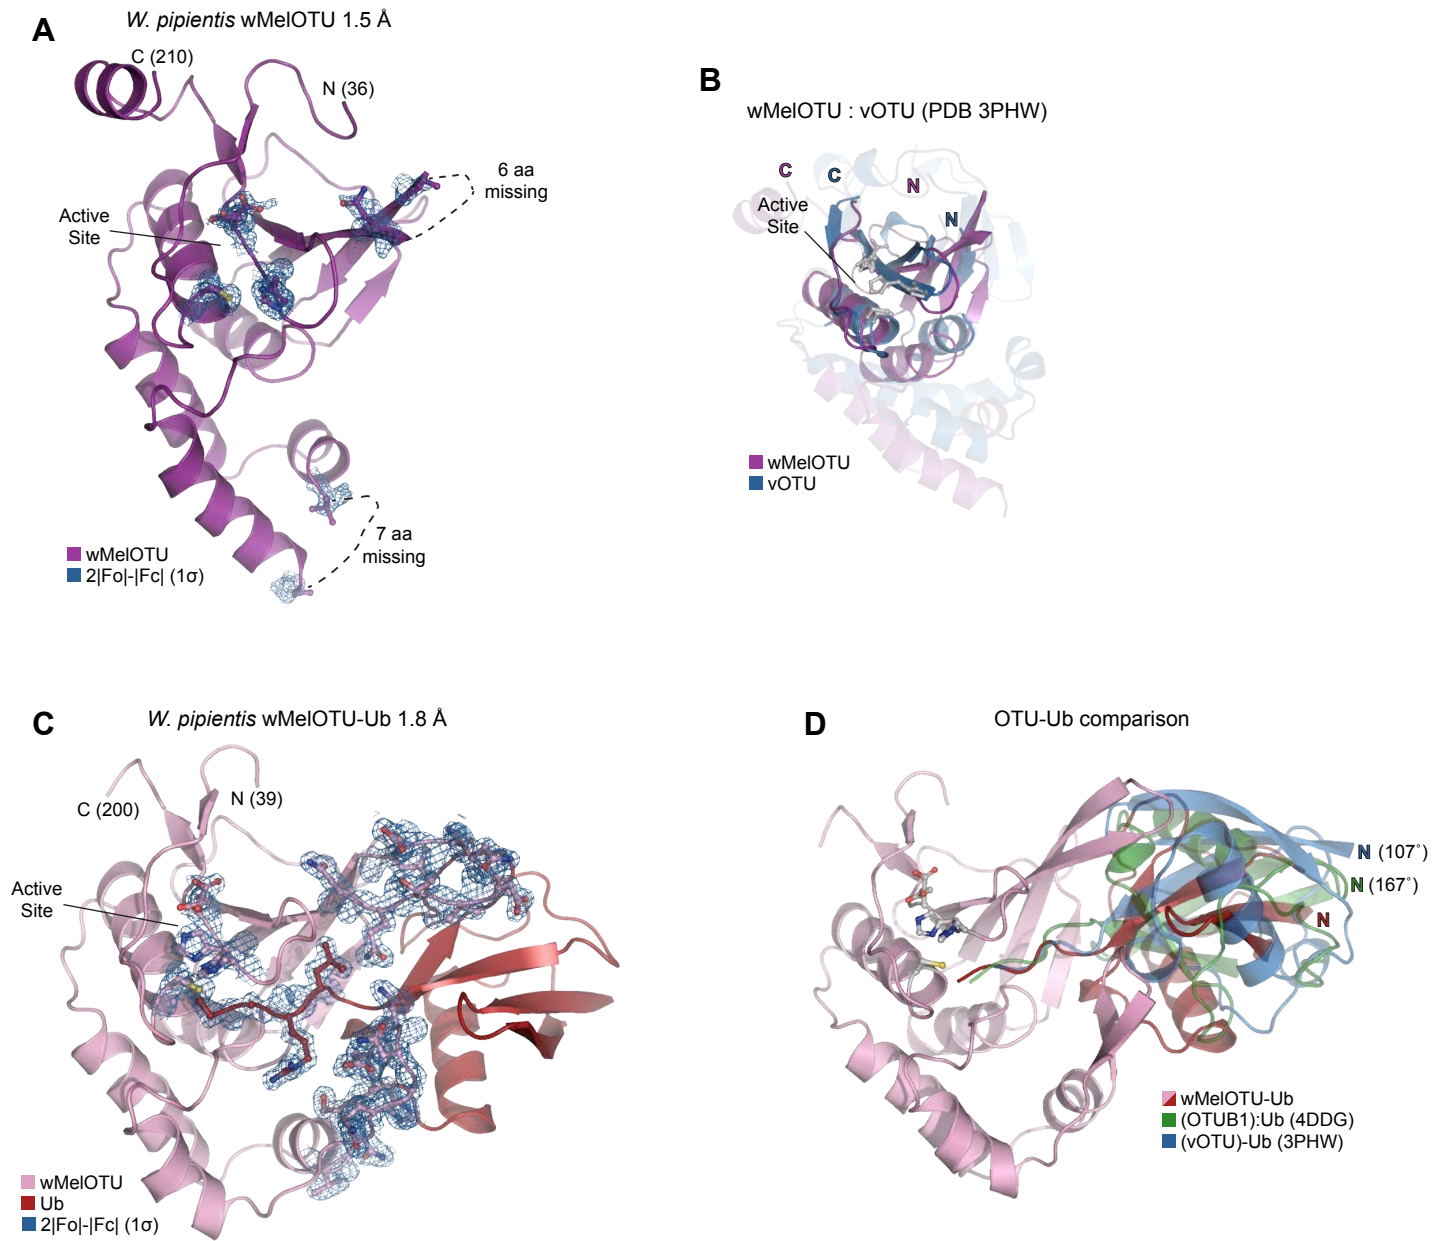

# Fig EV4. EschOTU structure shows altered sequence topology

**A**

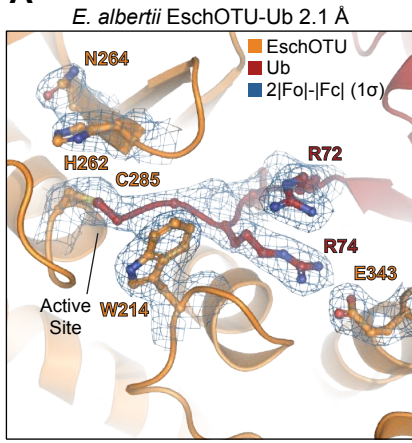

**B**

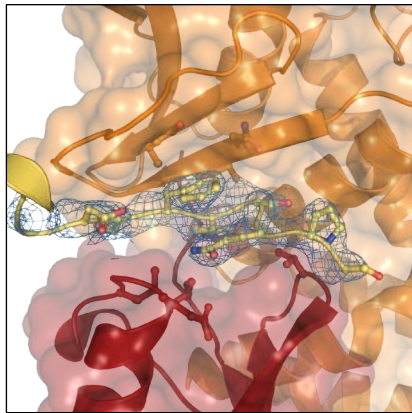

**C**

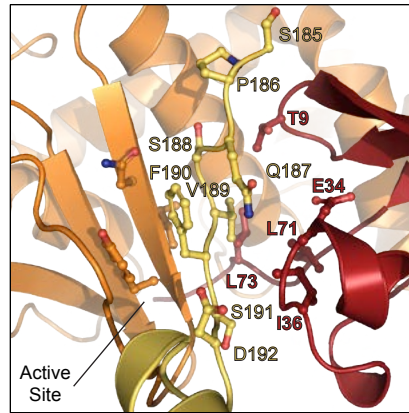

**D**

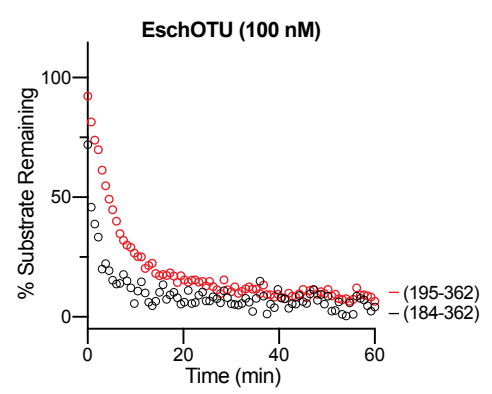

## Fig EV5. Cross-kingdom structural analysis of the OTU fold

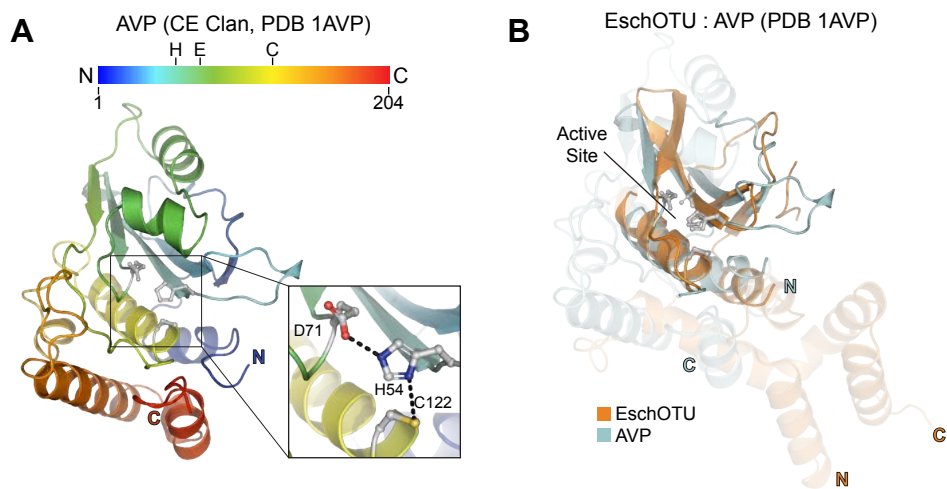

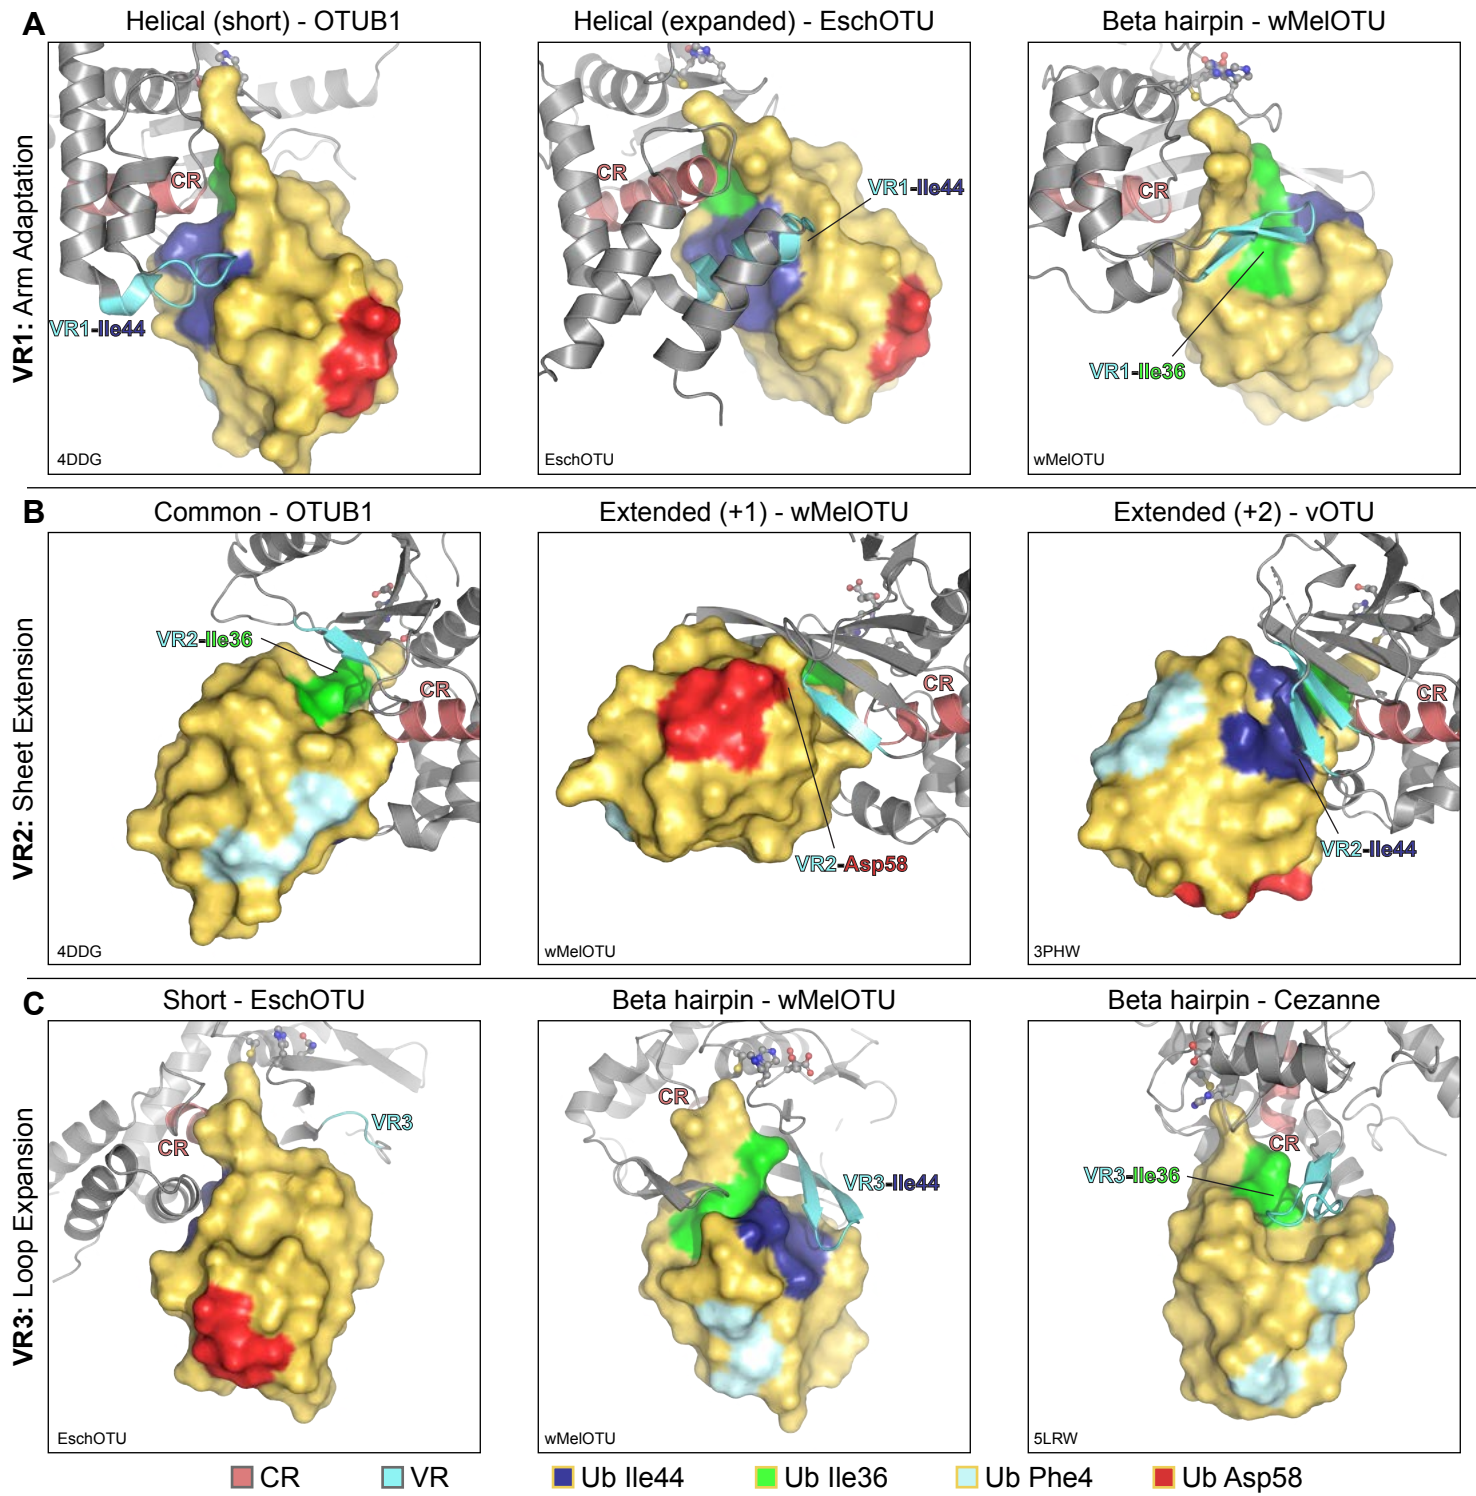

**Table 1. Data collection and refinement statistics**

|                                   | wMelOTU                | wMelOTU-Ub             | EschOTU-Ub             |
|-----------------------------------|------------------------|------------------------|------------------------|
| <b>Data collection</b>            |                        |                        |                        |
| Space group                       | $P 2_1 2_1 2_1$        | $C 1 2 1$              | $P 4_1 2 2$            |
| <b>Cell dimensions</b>            |                        |                        |                        |
| $a, b, c$ (Å)                     | 52.54, 56.64, 63.96    | 136.93, 78.20, 280.43  | 67.34, 67.34, 144.43   |
| $\alpha, \beta, \gamma$ (°)       | 90, 90, 90             | 90, 91.57, 90          | 90, 90, 90             |
| Resolution (Å)                    | 33.00-1.47 (1.52-1.47) | 27.29-1.82 (1.89-1.82) | 67.34-2.10 (2.18-2.10) |
| $R_{merge}$                       | 0.049 (0.678)          | 0.139 (0.867)          | 0.032 (0.884)          |
| $I/\sigma I$                      | 15.4 (2.7)             | 9.4 (2.8)              | 14.5 (1.5)             |
| Completeness (%)                  | 99.52 (99.76)          | 92.21 (94.66)          | 99.5 (99.6)            |
| Redundancy                        | 4.3 (4.1)              | 7.8 (7.7)              | 4.2 (4.4)              |
| <b>Refinement</b>                 |                        |                        |                        |
| Resolution (Å)                    | 33.00-1.47             | 27.29-1.82             | 67.34-2.10             |
| No. unique reflections / test set | 33002 / 3265           | 244560 / 24941         | 20025 / 1972           |
| $R_{work}/R_{free}$               | 0.162/0.189            | 0.167/0.208            | 0.218/0.256            |
| <b>No. atoms</b>                  |                        |                        |                        |
| Protein                           | 1309                   | 22775                  | 1961                   |
| Ligand/ion                        | 4                      | 192                    | 12                     |
| Water                             | 185                    | 3647                   | 63                     |
| <b>B-factors</b>                  |                        |                        |                        |
| Protein                           | 24.8                   | 22.7                   | 69.2                   |
| Ligand/ion                        | 58.1                   | 26.6                   | 76.4                   |
| Water                             | 42.0                   | 34.5                   | 67.7                   |
| <b>R.m.s. deviations</b>          |                        |                        |                        |
| Bond lengths (Å)                  | 0.014                  | 0.009                  | 0.015                  |
| Bond angles (°)                   | 1.36                   | 0.90                   | 1.26                   |

Values in parentheses are for highest resolution shell.
